# 1 *Plasmodium falciparum* Replication factor C subunit 1 is involved in 2 genotoxic stress response

3 Sheriff O<sup>a</sup>, Aniweh Y<sup>b</sup>, Soak-Kuan Lai<sup>a</sup>, Loo HL<sup>c</sup>, Sze, S. K<sup>a</sup>, Preiser PR<sup>a,c</sup> #

4 a. School of Biological Sciences, Nanyang Technological University Singapore, Singapore,  
5 Singapore.

6 b. West African Centre for Cell Biology of Infectious Pathogens, University of Ghana, Legon,  
7 Ghana.

8 c. Antimicrobial Resistance Interdisciplinary Research Group, Singapore-MIT Alliance for  
9 Research and Technology, Singapore, Singapore..

10 # Correspondence and requests for materials should be addressed to P.R.P. (email:  
11 ppreiser@ntu.edu.sg)

12

## 13 Abstract:

14 About half the world's population is at risk of malaria, with *Plasmodium falciparum*  
15 malaria being responsible for the most malaria related deaths globally. Antimalarial drugs such  
16 as chloroquine and artemisinin are directed towards the proliferating intra-erythrocytic stages  
17 of the parasite, which is responsible for all the clinical symptoms of the disease. These  
18 antimalarial drugs have been reported to function via multiple pathways, one of which induces  
19 DNA damage via the generation of free radicals and reactive oxygen species. An urgent need  
20 to understand the mechanistic details of drug response and resistance is highlighted by the  
21 decreasing clinical efficacy of the front line drug, Artemisinin.

22 The replication factor C subunit 1 protein is an important component of the DNA replication  
23 machinery and DNA damage response mechanism. Here we show the translocation of PfRFC1  
24 from an intranuclear localization to the nuclear periphery indicating an orchestrated  
25 progression of distinct patterns of replication in the developing parasites. PfRFC1 responds to  
26 genotoxic stress via elevated protein levels in soluble and chromatin bound fractions.

27 Reduction of PfrRFC1 protein levels upon treatment with antimalarials suggests an interplay of  
28 replication and DNA repair pathways leading to cell death. Additionally, mislocalization of the  
29 endogenously tagged protein confirmed its essential role in parasites' replication and DNA  
30 repair. This study provides key insights into DNA replication, DNA damage response and cell  
31 death in *Plasmodium falciparum*.

32

### 33 **Importance:**

34 Frontline drugs have been found to induce DNA damage in the human malaria parasite  
35 *Plasmodium falciparum*. The genotoxic stress response in *Plasmodium* and the interplay  
36 between DNA damage repair, replication and activation of programmed cell death pathways  
37 remains largely undescribed. This study shows a distinct pattern of localization of PfrRFC1  
38 during replication and DNA repair. PfrRFC1 responds to genotoxic stress with an increase in  
39 protein expression. Interfering with the RFC complex formation or mislocalization of PfrRFC1  
40 is associated with disrupted genotoxic stress response. Additionally, a reduction of PfrRFC1  
41 protein levels is observed upon treatment with antimalarial drugs or under apoptosis like  
42 conditions, highlighting the role of DEVD/G like motif in mediating programmed cell death in  
43 these parasites. This study sheds light on the role of PfrRFC1 in differentially responding to  
44 replication, genotoxic stress and programmed cell death in *Plasmodium* parasites.

45

46

47

48

49

50

51

52

53

## 54 Introduction:

55 *Plasmodium falciparum*, the main causative agents of malaria and responsible for most malaria  
56 related human deaths, has a digenetic lifecycle involving distinct developmental forms. The  
57 intraerythrocytic parasite has a haploid genome which is subjected to exogenous and  
58 endogenous insults arising via normal cellular processes such as; replication errors, heme  
59 degradation and exposure to antimalarial drugs like artemisinin, mefloquine and chloroquine<sup>1-</sup>  
60 <sup>3</sup>. Artemisinin resistant strains have also been associated with down regulation of DNA  
61 replication genes during ring<sup>4</sup>, trophozoite and schizont stages<sup>5</sup>.

62 The replication factor C (RFC) complex has been identified to be differentially regulated in  
63 artemisinin resistant parasites<sup>6</sup>. The Replication Factor C is a heteropentameric complex of five  
64 subunits (RFC1/2/3/4/5) conserved both in structure and function<sup>7-10</sup>. The RFC functions as a  
65 clamp loader of the proliferating cell nuclear antigen (PCNA) sliding clamps and as a RFC-  
66 PCNA-DNA complex bringing about DNA synthesis<sup>11</sup>. The RFC complex subunits contain  
67 conserved motifs termed RFC boxes I-VIII. These are responsible for DNA binding, PCNA  
68 interactions, DNA replication and RFC complex maintenance<sup>12</sup>. The RFC box I, present in the  
69 N-terminal of the larger RFC1 subunit, shows high homology to prokaryotic DNA ligases and  
70 BRCT domains<sup>13</sup> and is involved in DNA binding<sup>14</sup>. The four small RFC subunits from human  
71 and yeast align with the central part of the larger RFC1 subunit denoted by boxes II-VIII<sup>10</sup> and  
72 belong to the AAA+ (ATPases Associated with diverse cellular Activities) superfamily of

73 ATPases. The boxes II-VII are also important for DNA binding and loading of PCNA<sup>15,16</sup>. The  
74 interaction of RFC1 with PCNA has also been shown to be essential for the synthesis of repair  
75 templates during the two types of DNA repair mechanisms; DNA excision repair and double  
76 strand break repair (DSBR)<sup>17</sup>. Among the RFC subunits, the regions of the amino acid  
77 similarity exist in the N-terminal half of the protein, while the C-terminal regions of the  
78 subunits are unique and are required for the formation of the RFC complex<sup>18,19</sup>. RFC1 is also  
79 involved in apoptosis via a conserved putative caspase-3 cleavage site at the C-terminus of the  
80 DNA binding region. Fragments of RFC1 released upon protease activity inhibit DNA  
81 synthesis and promote apoptosis<sup>20,21</sup>.

82 The *Plasmodium* parasites activate both excision repair and DSBR mechanisms to remove  
83 DNA insults via the replacement of the DNA damage induced histone modifications<sup>22</sup>. PfRFC1  
84 involved in nucleotide excision repair is reported to be up-regulated by MMS induced  
85 genotoxic stress in *Plasmodium falciparum* parasites<sup>22</sup>. The ability of a parasite-cell-free lysate  
86 to repair apurinic/apyrimidinic sites revealed that *Plasmodium* parasites perform repair via the  
87 long patch base excision repair (BER) pathway<sup>23</sup>. This is unlike the mammalian and yeast  
88 systems which resort to a short one-nucleotide based repair. Other members of this pathway  
89 such as; PfFEN1, PfPCNA1 and PfPCNA2 have been reported to be expressed at higher levels  
90 in response to DNA damaging agents in *Plasmodium* parasites<sup>24</sup>. Homologous recombination  
91 repair; a form of DSBR, has been demonstrated to be the most effective DNA repair mechanism  
92 employed by the parasite to overcome deleterious double strand breaks in the DNA.  
93 Bioinformatics as well as homology modelling tools have been used to show the conservation  
94 of most of the components of the nucleotide excision repair mechanism<sup>25,26</sup>. Furthermore,  
95 experimental evidence suggests the presence of a functional alternate non-homologous end  
96 joining DSBR mechanism<sup>27,28</sup>. Transcriptome studies have also highlighted the activation of  
97 numerous DNA repair mechanisms upon treatment with genotoxic agents<sup>22</sup>. However, there

98 remains a lack of understanding of the interplay between these molecules as well as the  
99 functional characterization of the individual components.

100 Despite its importance in yeast and human cellular processes, the large subunit of the RFC  
101 complex in *Plasmodium* intra-erythrocytic cell cycle remains uncharacterized. In this study,  
102 PfRFC1 in *Plasmodium falciparum* was endogenously tagged and its localization was  
103 identified to be dynamic in asexual lifecycle of the parasite. Further, immunoprecipitation  
104 assay confirmed its interaction with the sliding clamp loader PCNA1 and identified other  
105 members of the complex. Treatment of *Plasmodium falciparum* parasites with genotoxic agents  
106 showed elevated protein levels of PfRFC1 and change in its localization. An N-terminal  
107 truncation of PfRFC1 containing the RFTS, when expressed in addition to the native PfRFC1  
108 affected recovery from genotoxic stress, highlighting the essential role of RFC1 in DNA  
109 damage repair in *P. falciparum*. Finally, conditional mislocalization of RFC1 confirmed its  
110 essential role in cell cycle progression of the asexual stages of the parasites as well as recovery  
111 from genotoxic stress.

## 112 **Materials and Methods:**

### 113 **Parasite culture and synchronization**

114 *Plasmodium falciparum* strains were cultured in human red blood cells donated within 30  
115 days prior to usage. Parasites were cultured in RPMI1640 media supplemented with 50mg/l  
116 gentamicin, 2g/l sodium bicarbonate, 0.25% Albumax II, and 0.1 mM hypoxanthine. The  
117 cultures were maintained in 1-2% parasitemia at 37°C under microaerophilic conditions.  
118 Cultures were synchronized using 5% D-sorbitol or by 68% percoll purification of schizonts  
119 followed by 5% D-sorbitol treatment post invasion. Synchronization of the parasites were  
120 verified by morphology of the parasites via giemsa stained thin blood smears.

121

## 122 Plasmids construction, Parasite transfections and integration conformation.

123 To generate the SLI (selection-linked integration) knock-in constructs a 551bp C-terminal  
124 fragment excluding the stop codon of PfRFC1 was PCR amplified from the *P. falciparum*  
125 genomic DNA. This fragment was inserted between the NotI/AvrII in the pSLI-2×FKBP-  
126 GFP<sup>29</sup> for pSLI-PfRFC1-GFP, and NotI/MluI sites after replacing the GFP tag with a codon  
127 optimized 3xHA tag in the pSLI-2×FKBP-GFP plasmid for pSLI-PfRFC1-HA constructs using  
128 primers F.RFC1\_NOT1, R.RFC1\_HA\_MLU1 and R.RFC1\_GFP\_AVR2 (Table S1).

129 The construct for the pDC2-RFC1Δ2 –HA cell line was generated by firstly PCR amplifying  
130 a 939bp N-terminal fragment between the Not1/Mlu1 site of pSLI-RFC1-HA to get the  
131 construct pSLI-RFC1Δ2\_HA using the primers F.RFC1Δ2\_HA\_NOT1 and  
132 R.RFC1Δ2\_HA\_MLU1 (Table S 1). This construct was used as a template to amplify the  
133 truncated RFC1 gene with the 3xHA tag using the primer F.RFC1Δ2\_HA and R.RFC1Δ2\_HA  
134 (Table S1). This fragment was inserted between the AvrII/XhoI site of the modified pDC2  
135 plasmid<sup>30</sup>.

136 pSLI-PfRFC1-HA and pSLI-PfRFC1-GFP plasmids were used to generate PfRFC1-HA and  
137 PfRFC1-GFP cells respectively by the following method. Synchronized ring stage parasites  
138 were transfected with 100 – 200 µg plasmids purified by NucleoBond Xtra Midi EF midiprep  
139 kit (Macherey-Nagel) by electroporation using Bio-Rad laboratories gene pulser X cell<sup>31</sup>.  
140 2.5nM WR99210 (Jacobus Pharmaceuticals, Princeton, NJ) was added 6-8hours post  
141 transfection for the pSLI construct and with blasticidinS (Invivogen) at 2 µg/ml for the pDC2  
142 plasmid. The media was changed daily for 5 days subsequently and drug selection was  
143 maintained until parasites were observed in the giemsa smears. Tagged protein expression was  
144 verified by western blotting prior to conducting assays.

145 For the pSLI plasmids, selection linked integration was performed as described<sup>32</sup> on  
146 parasites obtained from the first round of selection with WR99210 carrying the episomal  
147 plasmid. These were subjected to 400 µg/ml G418 (Gibco). Parasites obtained were tested for  
148 correct integration by the following PCR primers for the endogenous tagging of PfrFC1 (Table  
149 S1). F\_RFC1 and N\_MLU1\_PSLI confirmed the junction upstream of the site of integration,  
150 while primers FJ8C\_PARL and R\_RFC1\_UTR confirmed the region downstream of the  
151 plasmid at the site of integration. F\_RFC1 and R\_RFC1\_UTR confirmed the absence of the  
152 unmodified locus in the selected parasites (Table S1). Confirmed PfrFC1-GFP cells were  
153 subsequently transfected with pLyn-FRB-mCherry-nmd3-BSD plasmid expressing the plasma  
154 membrane mislocalizer under blasticidinS selection<sup>32</sup>. mCherry and GFP expressing parasites  
155 were enriched by counting 2 million cells on a BD FACSAria. Appropriate gating of cells was  
156 established using 3D7 parental parasites. These parasites were cultured under standard culture  
157 conditions prior to assays.

### 158 Co-Immunoprecipitation

159 Immunoprecipitations were performed on late stage trophozoite parasites by percoll  
160 enrichment. Enriched parasites were first treated with 0.5mM DSP (dithiobis[succinimidyl  
161 propionate], Thermo Scientific Pierce) for 30 min. The reaction was quenched with excess of  
162 25mM Tris-HCl pH7.5 in PBS for 10 min. The parasites were subsequently released from the  
163 RBC via 0.05% saponin (Sigma) in incomplete RPMI (RPMI1640 medium without  
164 AlbumaxII). The pellet fraction was then solubilized in 10 volumes of RIPA buffer  
165 (Thermo Fisher Scientific) with benzonase nuclease (EMD Millipore) and Halt protease  
166 inhibitor cocktail (Thermo Fisher Scientific) for 30min on ice. The clarified lysates were  
167 precleared with Protein A conjugated magnetic beads (Pierce) for 1 hour with rotation at 4C to  
168 remove non-specific protein binding. The precleared fraction was split equally between Anti-  
169 HA Magnetic Beads (Pierce) and Anti-c-Myc Magnetic Beads (Pierce) to immunoprecipitate

170 HA tagged proteins and nonspecific proteins respectively. These were incubated at 4C with  
171 rotation overnight. The IP beads were washed at least 5 times in cold RIPA and proteins were  
172 eluted by heating in non-denaturing loading buffer according to manufacturer's  
173 recommendation and then subjecting the eluted fraction to denaturation using Dithiothreitol  
174 (DTT) and heat.

### 175 Genotoxic agent treatment of *Plasmodium* parasites

176 HU (Hydroxyurea) (Sigma) and MMS (Sigma) were used for DNA-damage studies by  
177 treating synchronized late stage trophozoite (~36 hour) *P.falciparum* at 5% parasitemia.  
178 parasites were treated with MMS (0.005%) or HU (10mM) for 6 hour at 37°C in normal culture  
179 conditions in line with earlier studies on related replication proteins<sup>24</sup>. The parasites were  
180 retrieved for immunofluorescence assay. The parasites were released from erythrocytes with  
181 0.015% saponin in PBS, followed by multiple washes. Saponin extracted parasites were  
182 subjected to subcellular fractionation as described below or lysate preparation followed by  
183 western blot analysis. LiCor compatible secondary antibodies such as IRDye 800CW and  
184 IRDye 680LT goat anti- rabbit, goat anti-mouse and goat anti-rat were used in according to  
185 manufacturer's recommendation. Western blots were processed using the standard protocol by  
186 LiCor and imaged using a LiCor odyssey CLx imager and software. The data was analyzed  
187 and reported as mean±SD (n=3). Statistical analysis was performed using Microsoft excel and  
188 the student's t test was used to measure differences between means and  $p \leq 0.05$  was marked  
189 significant.

### 190 Drug treatment of *Plasmodium* parasites

191 Chloroquine was dissolved in water and filter sterilized to obtain working solutions of 1 mM  
192 which were made fresh and stored at 4°C in the dark. CQ treatment was performed at 1x IC50  
193 (30nM), 10x IC50 (300nM), 100xIC50 (3µM) concentrations. Artesunate (ART), an  
194 artemisinin derivative was dissolved in dimethylsulfoxide (DMSO). ART treatment of the



195 parasites was performed at concentrations of 1xIC<sub>50</sub> (2nM ) and 10xIC<sub>50</sub> (20nM). Parasitized  
196 erythrocytes were incubated for 6h prior to harvesting for western blot analysis. Staurosporine  
197 (ST, Sigma-Aldrich) stock solution (1 mM) was prepared by dissolving the drug in filtered  
198 DMSO and stored at -20°C. 100 mM of working ST solution was prepared before each  
199 experiment by diluting the stock solution with RPMI. Concentrations of Staurosporine (ST) at  
200 1, 2, 5 μM were used. Infected erythrocytes were treated for time and concentrations required  
201 prior to being washed twice with culture medium for assays. Controls for necrosis were  
202 generated by incubating parasites with 1-0.1%(W/v) of sodium azide for the required duration.  
203 Vehicle controls with DMSO or water were also utilized.

#### 204 **In vitro parasite survival assay**

205 To determine the survival of parasites after treatment with genotoxic agents, synchronized  
206 late stage trophozoites (~36 hour) at 1% parasitemia were subjected to concentrations of MMS  
207 ranging from 0.00005% to 0.005% for 6h. After the 6 hour incubation period the parasites were  
208 washed multiple times in RPMI medium and returned to fresh medium. Parasite recovery was  
209 measured ~18 hours after MMS washout. The parasites were stained with the nuclear stain  
210 Hoechst 33342 (Sigma) and parasitemia was measured via the Attune NxT Flow Cytometer  
211 (Thermo Fisher Scientific) or LSRFortessa™ X-20 (BD Biosciences).

#### 212 **IFA (Immunofluorescence Assay), antibodies & microscopy**

213 Synchronized *Plasmodium falciparum* infected erythrocytes were smeared onto glass  
214 slides and air dried. The slides were subsequently fixed for 5 min with cold methanol at -20°C.  
215 These slides were rehydrated in 1x PBS at room temperature for 15 min followed by blocking  
216 for 1 hour in 1x PBS containing 3% BSA (Bovine serum albumin, Sigma). The slides were  
217 then incubated for 1 hour at room temperature with 1xPBS+3% BSA with respective  
218 antibodies. Primary antibodies used in this study were anti-EXP2 Rabbit<sup>33</sup>, anti-HA Rat  
219 (Roche), anti-Histone H3 Rabbit (Abcam), anti-GFP mouse (Abcam) and anti-H3K9Me3

220 Rabbit (Abcam). The slides were washed for 15 min with 1x PBS/0.1% Tween20 post primary  
221 antibody treatment followed by 1 hour incubation at room temperature with 1x PBS+3%BSA  
222 containing secondary antibodies anti rabbit IgG-Alexa 488 or anti rat IgG-Alexa 594 (all from  
223 Jackson ImmunoResearch). The nuclear stain DAPI (2 $\mu$ g/ml) was then applied followed by  
224 washes with 1xPBS/0.1% Tween20 at room temperature. The coverslips were mounted using  
225 Fluoromount-G (southernbiotech). Slides were visualized on a Nikon Eclipse Ti fluorescent  
226 microscope with a Nikon Plan Apochromat Lambda 100X Oil objective. Pictures were taken  
227 using an Andor Zyla sCMOS camera and analysed using ImageJ 1.52n. For quantitative  
228 imaging, the images were captured with a Zeiss LSM710 confocal microscope equipped with  
229 an Airyscan detector (Carl Zeiss) using a Plan-Apochromat 100x/1.46 oil objective. These  
230 images were processed using imageJ 1.52n and Adobe Photoshop CS6.

### 231 **Total RNA extraction and Real time PCR analysis**

232 *Plasmodium falciparum* strains; W2mef, Dd2, Gb4, 3D7, K1 and NF54 well cultivated and  
233 D-Sorbitol synchronized. The parasites were harvested in 8-hour time difference across the 48  
234 hour life cycle. The harvested parasites were stored in TRIzol (Ambion/Life Technologies)  
235 pending RNA and DNA extraction. The parasites stages were homogenized in TRIzol with  
236 DNA and total RNA was extracted using the Direct-Zol RNA MiniPrep Plus kit (Zymo  
237 Research) according to manufacturer's protocol. Expression of mRNA transcripts for PfRFC1  
238 gene analysis were carried out using the Luna Universal One-Step RT-qPCR Kit (New England  
239 Biolabs, Inc.), on a QuantStudio 5 Real-Time PCR System (Applied Biosystems), using  
240 manufacturer's recommendations. The primers sets used in the assay are set1 and/or set2 for  
241 purposes of confirming the expression level (Table S1). The seryl-tRNA synthetase gene  
242 expression was used as the endogenous control. The Ct values generated from the expression  
243 analysis were converted to expression levels using the  $2^{-\Delta\Delta Ct}$  formula. Data were analyzed with  
244 Microsoft Excel and GraphPad software (v.7).

## 245 Subcellular Fractionation of Parasites

246 The detergent soluble and the insoluble fraction were prepared by adopting an existing  
247 protocol<sup>34</sup>. Parasites extracted with 0.015% saponin were lysed in Buffer A [20 mM HEPES  
248 (pH7.9), 10 mM KCl, 1 mM EDTA, 1 mM EGTA, 0.3% NP-40 and 1mM DTT] and Halt  
249 protease inhibitor cocktail (Thermo Fisher Scientific) with incubation on ice for 5 min. The  
250 insoluble nuclear fraction was pelleted down at 2700 x g and the soluble fraction was recovered.  
251 The pellet fraction was washed multiple times with buffer A followed by lysate preparation  
252 and western blot analysis. The efficiency of fractionation was confirmed by antibodies Anti-  
253 Histone H3 (Millipore) (marker for insoluble nuclear fraction) and Anti-PfAldolase Rabbit  
254 (GenScript) (marker for soluble fraction).

## 255 Protein complex characterization by immunoprecipitation tandem mass spectrometry

256 Immunoprecipitated and eluted proteins from each fractions were separated on 12% SDS-  
257 PAGE at 50 V and protein bands were visualized by staining with imperial protein stain  
258 (Pierce). The gel lanes corresponding to each of the fractions (HA beads and Control beads)  
259 were cut into 2 separate slices, then de-stained, and the proteins reduced by using dithiothreitol  
260 (DTT) and alkylated by iodoacetamide (IAA). The proteins were cleaved by overnight  
261 digestion in porcine trypsin (Sequencing Grade Modified, Promega, Wisconsin). The tryptic  
262 peptides were extracted by using 5% acetic acid in 50% acetonitrile and vacuum-dried by  
263 speedvac. The vacuum concentrated peptides were reconstituted in 0.1% formic acid (FA) and  
264 3% ACN for LC-MS/MS analysis in the Q-Exactive Hybrid Quadrupole-Orbitrap mass  
265 spectrometer, coupled with the UltiMate™ 3000 RSLCnano System (Thermo Scientific Inc,  
266 USA). The peptides were first concentrated with a Nano-Trap Columns 75-100 µm I.D. x 2 cm  
267 (Thermo Scientific, USA) and then separated on a Dionex EASY-Spray 75 µm x 10 cm column  
268 packed with PepMap C18, 3 µm, 100 Å (Thermo Fisher Scientific, USA). The mobile phase  
269 buffers used were 0.1% formic acid (A) and 0.1% formic acid in ACN (B) and a 60 min gradient

270 was used for peptide separation. The samples were ionized and injected into the Q-Exactive  
271 mass spectrometer with an EASY nanospray source (Thermo Fisher Scientific, Inc.) at an  
272 electrospray potential of 1.5 kV. A full MS scan (350–1,600 m/z range) was acquired at a  
273 resolution of 70,000, with a maximum ion accumulation time of 100 ms. Dynamic exclusion  
274 was set as 30 s. The HCD spectral resolution was set to 35,000. Automatic gain control (AGC)  
275 settings of the full MS scan and the MS2 scan were 3E6 and 2E5 respectively. The top 10 most  
276 intense ions above the 5,000 count threshold were selected for fragmentation in higher-energy  
277 collisional dissociation (HCD), with a maximum ion accumulation time of 120 ms. Isolation  
278 width of 2 was used for MS2. Single and unassigned charged ions were excluded from MS/MS.  
279 For HCD, the normalized collision energy was set to 28% and the under fill ratio was defined  
280 as 0.3%.

## 281 Database searching

282 The raw data generated for each sample were analyzed using the Proteome Discoverer (PD)  
283 1.4 software (Thermo Scientific, San Jose, CA). Protein identification was done by mapping  
284 against a customized protein sequence database combined from UniProt *Homo sapiens*  
285 proteome, the *P. falciparum* 3D7 proteome in PlasmoDB 13.0 and common contaminant  
286 database (<http://maxquant.org/contaminants.zip> and  
287 <ftp://ftp.thegpm.org/fasta/cRAP/crap.fasta>), using the SequestHT and Mascot search engines.  
288 The Proteome Discoverer's workflow included an automatic target-decoy search tactic along  
289 with the Percolator to score peptide spectral matches from both Mascot and SequestHT  
290 searches to estimate the false discovery rate (FDR). The Percolator parameters are set to  
291 maximum delta Cn = 0.05; target FDR (strict) = 0.01; target FDR (relaxed) = 0.05, validation  
292 based on q-value. The search parameters also included full trypsin digestion with a maximum  
293 of two missed cleavage and precursor mass tolerance and fragment mass tolerance was set at  
294 10 ppm and 0.02 Da respectively. Carbamidomethylation (+57.02) at cysteine was set as fixed

295 modification, oxidation (+15.99) at methionine, deamidation (+0.98) at asparagine and  
296 glutamine. Precursor ion area was used for protein quantitation.

297 Protein identifications were considered valid if  $\geq 2$  unique peptide sequences were detected.  
298 Statistically significant peptide matches corresponding to specific protein hits in bait IP  
299 reactions (or alternatively, peptide enrichment was compared with the control) were collated  
300 into tables ordered based on peptide enrichment (Table S2). Proteins known to be typical  
301 contaminants were excluded from the analysis. For charting, the number of peptides displayed  
302 represents the total number of peptide matches across all replicates and experiments.

## 303 Results:

### 304 RFC1 localizes dynamically through intraerythrocytic developmental cycle

305 In order to confirm the identity and conservation of *Plasmodium falciparum* RFC1  
306 (PfRFC1, PF3d7\_0219600), its amino acid sequence was compared with human (HsRFC1) and  
307 yeast (ScRFC1) to reveal a sequence identity of ~28% (Fig. 1A). PfRFC1 also shared the  
308 important functional conserved boxes I-VIII regions (Fig. 1B). The N terminus of human and  
309 yeast RFC1 possess a 20 amino acid replication factory targeting sequence (RFTS) consisting  
310 of a PCNA interacting protein motif (PIP)<sup>35</sup> and a stretch of positively charged residues. This  
311 RFTS found at the N-terminal region is highly conserved across the species and was recessed  
312 by ~90 amino acids within the N-terminal of PfRFC1 (Fig. 1C).

313 The protein expression profile and localization was studied by generating transgenic  
314 parasites expressing PfRFC1 tagged with a triple haemagglutinin tag (PfRFC1-3xHA) in its  
315 endogenous loci via SLI (selection-linked integration)<sup>29</sup>. The successful integration was  
316 confirmed by PCR (Fig. 1D) and the protein was detected by western blotting in the parasite  
317 fraction (Fig. 1E). PfRFC1 was more abundant in the schizont stages (Fig. 1F). RT-PCR  
318 performed on RNA extracted every 8h over the 48h life cycle of 6 laboratory strains of

319 *P.falciparum* revealed a basal level of expression in the early stages of the cell cycle with an  
320 increase of 2-5 fold observed in the schizont stages (Fig. 1G). seryl-tRNA synthetase gene  
321 expression was used as the endogenous control. Interestingly, the two multidrug resistant  
322 strains K1 and Dd2 showed only ~2 fold stage dependent up-regulation in schizont stages (48  
323 hours). The increased transcription of PfRFC1 observed in most strains correlated with  
324 increased DNA synthesis in the parasite leading up to schizogony and is in line with previous  
325 transcription studies<sup>36,37</sup> and reports showing increased replisome protein levels at the  
326 trophozoite and schizont stages<sup>38</sup>.

327 As RFC1 has been shown to be recruited to the replication foci in other organisms,  
328 immunofluorescence microscopy was used to establish the localization of PfRFC1 in PfRFC1-  
329 3xHA parasites. Consistent with the western blot data, immunofluorescence shows the  
330 presence of PfRFC1 in the ring, trophozoite and schizont stages. Co-localization with the DAPI  
331 stained nucleus indicated nuclear localization of PfRFC1 (Fig. S1). Labelling the parasite  
332 periphery with anti-Exp2 showed that PfRFC1 is found parasite internal and is located in  
333 numerous punctate nuclear foci within the trophozoite nucleus (white) marked by DAPI (Fig.  
334 1H). These foci are consistent with the observation of replication factories at sites of active  
335 replication in these stages<sup>24,39</sup>. In segmented schizonts, PfRFC1 while still co-localizing with  
336 DAPI, is predominately observed at the periphery of the segmented nuclei (Fig. 1H). Further,  
337 egressed merozoites show PfRFC1 in a single punctae at the edge of each nuclei (Fig. 1H,  
338 white arrows). Quantification of these nuclei across the stages was performed for multiple cells  
339 to determine the presence of the signals of PfRFC1 within and outside the nuclei marked by  
340 DAPI. The Pie-charts show that the signal of PfRFC1 is predominantly inside the nucleus in  
341 the trophozoite stages while progressively migrating outside the nucleus as the parasite matures  
342 to schizonts and free merozoites where they are observed in the nuclear periphery. The  
343 localization of PfRFC1 is significantly altered between the trophozoite and schizont stages

344 where the total PfRFC1 signals within the nucleus are  $81.3 \pm 8.07$  % in trophozoites and  
345  $56.63 \pm 0.79$  % in schizont ( $p < 0.05$ ). The Pearson's Coefficient indicated in the figure ( $r = 0.733$   
346 for trophozoites;  $r = 0.779$  for schizonts;  $0.762$  for ruptured schizonts) measures the co-  
347 localization of HA with DAPI, and reflects the co-localization of the PfRFC1 signal with the  
348 nuclear stain respectively (Fig. 1H). The pattern of localization of PfRFC1 was compared with  
349 that of PfH3K4Me3 one of the most abundant histone marks in the genome of *P.falciparum*  
350 and postulated to be associated with intergenic regions. PfH3K4Me3 has been reported to be  
351 localized in a horseshoe shaped pattern at the nuclear periphery of the parasites representing  
352 sites of active translation<sup>40,41</sup>. The signals of H3K4Me3 localize with the sites of PfRFC1 in  
353 schizont (pearson's coefficient of 0.711) and diverge in merozoites stages (pearson's  
354 coefficient of 0.459) correlating with the end of replication (Fig. 1H).

### 355 [RFC1 reveals a complex associating with PCNA1](#)

356 In order to identify the interacting partners of PfRFC1, Co-immunoprecipitation (CoIP) was  
357 performed on PfRFC1-3xHA late stage trophozoites and the eluted proteins were identified by  
358 mass spectrometry. Successful Co-IP was confirmed by gel staining (data not shown) and by  
359 western blot to detect the enrichment of PfRFC1 in the HA beads (Fig. 2A). PfPCNA1 was  
360 also found to be enriched in the HA beads confirming the interaction of PfRFC1 at the  
361 replication foci. PfAldolase, a cytoplasmic protein and PfHistone3, a nuclear marker, were used  
362 as controls and were not identified on the bead fractions by western blotting. Mass spectrometry  
363 of the IP fraction identified a total of 59 *P.falciparum* proteins with at least 2 unique peptides  
364 detected in HA bead sample and 6 of these were also detected in the control bead sample of the  
365 trophozoite stage IP (Table S2). Among these proteins heat shock proteins and annotated  
366 ribosomal proteins were excluded as common contaminants leaving behind 39 proteins.  
367 Importantly, the most highly abundant interacting partners with  $\geq 4$  peptides enriched on the  
368 HA beads (Fig. 1B) represent the expected subunits of the Replication factor c consisting of

369 proteins PfRFC1-5. Nuclear proteins such as PfRAN, DNA replication licensing factor  
370 PfMCM2, and topoisomerase I were also enriched in the IP. PfPCNA1 although detected by  
371 Western blot was only identified by one unique peptide by mass spectrometry. Numerous  
372 exported, glycolytic, proteolysis and RNA binding proteins such as PfAlb1 were also  
373 identified in the IP and are likely non-specifically or weakly associated with the PfRFC1  
374 interactome. Metabolic pathways enrichment analysis of the Co-immunoprecipitated proteins  
375 showed an abundance of proteins involved in oxidative stress and DNA replication and repair  
376 (Fig. 1C) highlighting the role of PfRFC1 in these processes.

### 377 **PfRFC1 is stimulated upon DNA damage**

378 We investigated the involvement of PfRFC1 in DNA repair as the IP of PfRFC1 indicated  
379 the presence of PfPCNA1 enriched in the PfRFC1 IP sample. To evaluate the impact of  
380 genotoxic stress on PfRFC1, synchronized early trophozoite stages were treated with MMS  
381 (0.005%) or HU (10mM) for 6h in line with earlier studies on related replication proteins<sup>24</sup>. In  
382 *P.falciparum*, MMS has been verified via comet assays to cause DNA damage leading to  
383 elevated transcripts of repair components PfRAD51, PfRAD54, PfRFC1<sup>22,42</sup> and elevated  
384 protein levels of PfRAD51, PfPCNA1 and PfPCNA2<sup>24</sup>. MMS, an alkylating agent is  
385 responsible for stalling of DNA synthesis in the S-phase via single and double strand breaks<sup>43</sup>,  
386 while HU targets ribonucleotide reductase and induces genomic instability by arresting  
387 replication fork progression due to the depletion of dNTPs<sup>44,45</sup>. Western blot analysis of equal  
388 fractions of treated parasites showed an increased protein expression of PfRFC1 by  $3.4 \pm 0.57$   
389 fold upon MMS treatment (n=3, p=0.014) and  $2.85 \pm 0.51$  upon HU treatment (n=3, p=0.023)  
390 (Fig. 3A, B) as compared to control treatment. PfAldolase, a constitutively expressed protein  
391 served as a control. In parallel, parasites treated with MMS and HU were fractionated into  
392 soluble and chromatin bound fractions. These samples were analyzed by western blotting and  
393 probed with anti HA antibody to detect PfRFC1, PfAldolase for the soluble fraction and



394 PfHistone3 for the chromatin bound fraction. Three independent experiments confirmed the  
395 significant increase of PfRFC1 levels upon treatment with genotoxic agents (Fig. S2 A, B).  
396 The increase of RFC1 in the whole cell lysates upon DNA damage was also reflected in its  
397 enrichment in both the soluble and the chromatin bound fraction highlighting its role in the  
398 response to genotoxic agents.

399 Immunofluorescence assay on fixed PfRFC1-3xHA schizont parasites after MMS or HU  
400 treatment showed that while in the untreated control PfRFC1 was located at the nuclear  
401 periphery, this changed to a more dispersed location within the nucleus in the parasites  
402 subjected to genotoxic stress (Fig. 3C). PfRFC1 in trophozoite stage parasites was observed  
403 via immunofluorescence to form punctate patterns throughout the nucleus in control as well as  
404 treated samples as expected of its role in replication and repair. (Fig. S2C). The signal of  
405 PfRFC1 shows partial co-localization with PfH3K4Me3 as observed previously (Fig. 3C). It  
406 however did not completely localize with PfH3K4Me3 highlighting the compartmentalization  
407 of PfRFC1 from these regions in late stage schizonts (Fig. 3C, white arrows).

#### 408 **Critical role of PfRFC1 in DNA damage recovery**

409 To assess the role of PfRFC1 upon genotoxic stress in greater detail we co-expressed a  
410 truncated fragment of PfRFC1. The N-terminal of PfRFC1 including the RFTS and BRCT  
411 domain was tagged with a 3xHA tag and overexpressed in *P.falciparum*<sup>29</sup>. The selected  
412 parasites replicated at a rate comparable to the controls indicating no significant effect on  
413 replication. The truncated PfRFC1 (PfRFC1 $\Delta$ 2-HA) lacks the AAA+ATPase domain as well  
414 as the RFC1 C-terminal homology domain (Fig. 4A). The exclusion of the C-terminal RFC1  
415 homology domain prevents the assembly of the RFC1-5 complex while continuing to interact  
416 with PCNA1 via the RFTS impairing excision repair. The expression of PfRFC1 $\Delta$ 2-HA was  
417 verified with a band at 41.1 KDa via western blotting on the parasite lysates (Fig. 4B). Since  
418 PfRFC1 $\Delta$ 2-HA contains the BRCT domain, reported to be involved in DNA binding, the

419 ability of the truncated protein to be associated with the chromatin fraction was investigated  
420 (Fig. 4C). The truncated PfRFC1 $\Delta$ 2-HA was observed in both the soluble and the chromatin  
421 bound fraction confirming its ability to associate with chromatin. Immunofluorescence assay  
422 on the parasites expressing the truncated PfRFC1 $\Delta$ 2-HA also showed nuclear localization (Fig.  
423 4D) while the signals remained diffuse unlike the punctate pattern observed for the full length  
424 PfRFC1.

425 It has been suggested that the DNA repair continues upon washout of genotoxic stressors.  
426 Our data suggests that the truncated protein localizes in the nucleus and associates with DNA  
427 potentially providing us with a tool to evaluate the ability of the parasite to deal with DNA  
428 damage upon overexpression of a fragment incapable of forming the RFC complex.  
429 PfRFC1 $\Delta$ 2-HA contains the RFTS known to be involved in PCNA binding, a protein critical  
430 in the DNA repair pathway. The ability of PfRFC1 $\Delta$ 2-HA to interfere with the DNA repair in  
431 the presence of the full length native PfRFC1 was therefore investigated (Fig. 4E). Recovery  
432 upon washout of the genotoxic drug MMS from PfRFC1 $\Delta$ 2-HA expressing parasites treated  
433 with 0.005%, 0.001%, and 0.0005% of MMS showed significant lower survival rates than the  
434 control, suggesting hampered DNA damage repair. A parasite line transfected with the plasmid  
435 containing only the HA tag under the same drug pressure was utilized as control and these  
436 recovered similar to PfRFC1 $\Delta$ 2-HA parasites under DMSO treatment and treatment with  
437 0.00005% MMS. These results suggest that the presence of the N-terminal domain containing  
438 both the PCNA binding motif as well as the BRCT domain of PfRFC1 interferes with the DNA  
439 repair mechanisms likely due to the formation of non-functional DNA repair complexes.

#### 440 **Effect of antimalarials on PfRFC1**

441 As numerous antimalarial drugs such as artemisinin and chloroquine also induce genotoxic  
442 stress leading to cell death<sup>1,46</sup>, we were interested in establishing the role of PfRFC1 in  
443 responding to these types of stressors. The trophozoite stages of PfRFC1-3xHA were treated

444 for 6 hours independently with various concentrations of Artesunate (ART) as well as  
445 chloroquine (CQ). sodium azide was used as an agent to induce necrosis. ART treatment of the  
446 parasites was performed at concentrations of 1x IC<sub>50</sub> (2 nM ) and 10x IC<sub>50</sub> (20nM) which were  
447 reported to induce DNA fragmentation in trophozoite stages at 1 hour post treatment<sup>2</sup>. CQ  
448 treatment was performed at 1x IC<sub>50</sub> (30 nM), 10x IC<sub>50</sub> (300 nM), 100x IC<sub>50</sub> (3 μM)  
449 concentrations. At low concentrations of CQ (1x, 10x IC<sub>50</sub>) DNA damage was previously  
450 reported with markers of apoptosis being activated only at higher concentrations (100x IC<sub>50</sub>)<sup>1</sup>.  
451 Western blotting of parasite lysates obtained after the treatments showed no significant change  
452 for 2 nM ART treatment while a small reduction of PfRFC1 levels at 20 nM of ART treatment  
453 was observed (Fig. 5A). Similarly, the highest concentration of CQ led to a significant  
454 reduction of the protein (Fig. 5A). The parasites subjected to high concentrations of sodium  
455 azide (1%) treatment showed a significant reduction of full length PfRFC1 arising from  
456 unregulated necrosis (Fig. 5A). The significant reduction of PfRFC1 observed (Fig. 5A) is a  
457 deviation from the up-regulation of PfRFC1 observed upon MMS treatment (Fig. 3A,B) and is  
458 possibly the result of protease activity induced at high drug concentrations leading to apoptosis  
459 / programmed cell death like effects on PfRFC1. This is in agreement with the observation that  
460 high levels of CQ leads to activation of apoptosis like features observed via the cleavage of  
461 DEVD/G motifs by proteases<sup>1</sup>. PfRFC1 contains a conserved DEVD/G motif in box V and this  
462 motif has been found to be cleaved upon induction of apoptosis in a variety of cell types<sup>20</sup>.

463 We were therefore interested in identifying the contribution of apoptosis/programmed cell  
464 death (PCD) like features on PfRFC1 upon treatment with antimalarial drugs. In order to  
465 measure the effect of apoptosis on PfRFC1 protein levels, concentrations of Staurosporine (ST)  
466 at 1, 2, 5 μM were added to synchronized trophozoites. These parasites were treated for 10  
467 hours and 0.1% sodium azide was used as a necrosis control. The signals of PfRFC1  
468 significantly reduced to 60.32% as compared to control amounts at Staurosporine (ST)

469 concentration of 5  $\mu$ M (Fig. 5B). This is lower than 10  $\mu$ M ST used previously to induce  
470 apoptosis in *P.falciparum* under similar conditions<sup>1</sup>. No significant reduction was observed  
471 upon treatment with a necrosis control agent, 0.1% sodium azide. This indicated an apoptosis  
472 specific reduction of PfRFC1 levels. The parasites treated with 1% sodium azide as well as  
473 high doses of antimalarials therefore had a more significant apoptotic response towards  
474 PfRFC1 (Fig. 5A) leading to a reduction in the protein levels. The western blots with anti-HA  
475 antibody and PfAldolase as loading controls are provided for the various antimalarial and  
476 Staurosporine treatments (Fig. S3 A, B). PfRFC1 $\Delta$ 2-HA parasites overexpressing a truncated  
477 PfRFC1 lacking the DEVD/G protease cleavage site did not show a ST or necrosis dependent  
478 change in the protein levels as observe via western blotting (Fig. S3C).

#### 479 **Mislocalisation of RFC1 is detrimental**

480 As RFC1 was successfully tagged by modifying its endogenous loci, we utilized the knock  
481 sideways (KS) approach of functional analysis<sup>29,47,48</sup>. Here, PfRFC1 was endogenously tagged  
482 with 2xFKBP-GFP and also transfected with a plasma membrane mislocalizer containing  
483 FRB\*-mCherry. The cell line, PfRFC1-GFP was validated for integration at the correct locus  
484 (Fig. 6A).The expression was verified by probing the cell lysate for GFP (Fig. 6B). Upon  
485 addition of 200 nM rapamycin, FRB\* rapidly dimerizes with FKBP thereby sequestering  
486 PfRFC1 from the nucleus into the parasite plasma membrane. This was evident as early as 12  
487 hours post addition of rapamycin where PfRFC1-GFP was observed to be present in the  
488 parasite cytoplasm (Fig. 6C).

489 The parasites expressing the tagged PfRFC1 and the plasma membrane mislocalizer were  
490 treated with the inducer Rapamycin and a control. The parasitemia was tracked over a period  
491 of weeks (Fig. 6D). On Day 10 onwards, the cell line subjected to rapamycin treatment showed  
492 retardation in growth eventually leading to cell death highlighting the essentiality of PfRFC1.  
493 The ability of the cells to recover from DNA damage upon the specific mislocalization of

494 PfRFC1 was investigated at day 6 where the control and mislocalized parasites continue to  
495 grow at comparable rates. The ability of these parasites to perform DNA repair upon MMS  
496 mediated genotoxic stress was also evaluated. Synchronized control and rapamycin treated  
497 trophozoites at day 6 were treated with 0.001% and 0.0005%, of MMS. DMSO was used as a  
498 control treatment. The parasites subjected to the mislocalizer rapamycin and treated with MMS  
499 recovered to a significantly lesser extent than the MMS treated and non-mislocalized parasites  
500 (Fig. 6E). This suggested that the ability to recover from DNA damage is perturbed in  
501 *Plasmodium* upon PfRFC1 mislocalization.

## 502 Discussion

503 The involvement of DNA damage repair response in *P. falciparum* parasites treated with  
504 antimalarial drugs such as artemisinin has highlighted the need to understand this mechanism<sup>22</sup>.  
505 The emerging resistance to artemisinin involving delayed asexual growth stages indicates an  
506 involvement of the replication machinery<sup>6</sup>. Further, studies aimed at identifying the molecular  
507 response in parasites exposed to genotoxic stress have identified a variety of early transcribed  
508 genes<sup>22</sup>. PfRFC1 is an important component of the DNA repair pathway in these parasites and  
509 was observed to be upregulated upon genotoxic stress<sup>22</sup>.

510 The localization of the largest subunit of this complex PfRFC1 has been observed to be  
511 developmentally regulated. In the trophozoite stage where active DNA replication occurs,  
512 PfRFC1 is observed in punctate patterns within the nucleus. These foci are the probable regions  
513 of interactions with PfPCNA1 via the PCNA binding motif present in both the N and C terminal  
514 of PfRFC1. These replication foci contain the replication machinery and PCNA is considered a  
515 marker for these replication factory sites<sup>24</sup>. As the parasites mature into well segmented  
516 schizonts towards the end of replication, PfRFC1 is sequestered at the nuclear periphery (Fig.  
517 1H). This is in agreement to studies on the spatial distribution of replication sites showing  
518 replication factories within the nucleus in S phase which translocate to the nuclear periphery

519 towards the end of replication at sites where the telomeres are attached to the nuclear membrane  
520 <sup>49</sup>. The staining pattern of PfrFC1 with PfH3K4Me3 in late stage schizonts show specific  
521 regions of overlap at the nuclear periphery hinting at the presence of intergenic regions  
522 undergoing replication at the nuclear periphery as well (Fig. 3C). These PfrFC1 signals further  
523 translocate from the external nuclear periphery in segmented schizonts to a single punctae in  
524 the egressing merozoites (Fig. 1H). The localization of PfrFC1 therefore reflects a well-  
525 orchestrated progression of distinct patterns of replication in the developing merozoites. The  
526 change in localization post replication has been noted in the case of PforC1, PforCNA1 as well  
527 as PforC5, however a clear external nuclear peripheral localization has not been  
528 documented<sup>50,51</sup>. PforC1, the origin recognition complex protein 1 observed at the replication  
529 foci during S phase tends to be degraded at the segmented schizont stages<sup>50</sup>. Other well  
530 documented plasmodium replication proteins such as PforCNA1 and PforC5 are known to  
531 disassemble from the replication foci post replication<sup>50</sup>.

532 This PfrFC1 complex was effectively immunoprecipitated and confirmed via mass  
533 spectrometry and western blotting. Proteins enriched in the IP indicate the successful  
534 enrichment of the PfrFC1-5 complex (Fig. 2A, B). The proteins identified are significantly  
535 enriched in oxidative response, DNA repair and damage recovery proteins. PfAlba1 was  
536 notably enriched. PfAlba1 has been previously described to be a perinuclear protein in the ring  
537 stages, migrating to the cytoplasm in the mature intra erythrocytic stages of the parasite<sup>52</sup>. The  
538 Significance of the PfrFC1 complex and any potential interactions with PfAlba1 remains to  
539 be determined.

540 The survival of the plasmodium parasite within the host depends on its ability to counteract  
541 hostile environmental threats such as the host immune response, oxidative free radicals and  
542 drug challenges. The parasite has numerous mechanisms of protecting its DNA such as the  
543 Base excision repair, nucleotide excision repair, homology independent end joining

544 mechanisms, and the Rad51 mediated homologous recombination pathway<sup>22-24</sup>. This study  
545 elaborates on the RFC1 protein, a factor involved in DNA replication and nucleotide excision  
546 repair<sup>53</sup>. When the replicating trophozoite stage parasites were subjected to genotoxic stress via  
547 differentially acting drugs such as MMS and HU, a robust accumulation of PfRFC1 was  
548 observed in the cell lysates (Fig. 3 A, B). The increase in protein levels is also reflected in the  
549 increase in levels of the soluble and chromatin bound PfRFC1 in the parasite nucleus (Fig. S2  
550 A, B). Additionally, the Perinuclear localization of PfRFC1 observed in segmented schizonts  
551 stages reflecting a distinct pattern of progression of replication is affected upon genotoxic stress  
552 leading to the enrichment of PfRFC1 into numerous distinct punctae within the nucleus (Fig.  
553 3C). The sites containing PfRFC1 retained within the nucleus potentially harbor other repair  
554 components such as PfPCNA1, PfORC5 etc. in cells subjected to genotoxic stress. The  
555 functional increase in the level of the chromatin bound form has been associated with DNA  
556 repair activity mediated by pol $\delta$  or Pol $\epsilon$ <sup>54</sup>. Numerous excision repair components such as FEN-  
557 1, DNA Ligase 1 etc. have also been identified in *P.falciparum*<sup>55</sup> and the involvement of  
558 PfPCNA1, 2 and PfFEN-1 has been studied to be key in the long patch BER<sup>56</sup>. This increase  
559 in replication machinery and recombination repair components upon DNA damage has been  
560 observed in *P.falciparum* for proteins such as PfRFC1, PfPCNA1, PfRAD51 and PfFEN-1<sup>22,24</sup>.

561 PfRFC1 digresses from reported RFC1 proteins via the elongated N-terminus segment with  
562 a recessed replication factory targeting sequence (Fig. 1B, C). This region isn't essential for  
563 viability in human and yet it plays an important role in vivo to facilitate DNA damage repair<sup>18</sup>.  
564 An N-terminal region containing the RFTS, a PCNA binding domain, and the BRCT domain  
565 was found to be generated during apoptosis and localizes to sites of DNA damage by  
566 interacting with PCNA<sup>57</sup>. Additionally, in a variety of cell types, RFC1 has been reported to be  
567 cleaved by caspase-3 at an evolutionarily conserved motif (DEVD/G) spanning Box V-VI upon  
568 activation of apoptosis<sup>20,21</sup>. This Caspase-3 generated N-terminal fragment actively inhibits

569 DNA replication, thereby mediating cell cycle arrest. An assay designed to measure recovery  
570 of parasites from genotoxic stress indicated that the ectopic expression of a similar N-Terminal  
571 fragment of PfRFC1 leads to reduced parasite survival only upon DNA damage (Fig. 4D). *P.*  
572 *falciparum* lacks molecular evidences for pathways leading to apoptosis or programmed cell  
573 death (PCD). The absence of caspase homologs in *P. falciparum* hints at the involvement of  
574 metacaspase orthologs or clan CA/CD cysteine proteases. Studies using Chloroquine (CQ)  
575 treated parasites have recorded the induction of DNA fragmentation, activation of cysteine  
576 proteases, and features of PCD<sup>1,58</sup>. Artesunate (ART) a derivative of artemisinin induced DNA  
577 double strand breaks in *P. falciparum* leading to the generation of reactive oxygen species  
578 ultimately resulting in cell death<sup>2</sup>. Therefore, the effect of Antimalarial drugs such as  
579 artemisinin and chloroquine (CQ) on PfRFC1 was investigated. The parasites subjected to high  
580 concentrations of CQ and ART, resulted in reduced levels of full length PfRFC1 unlike the  
581 control or low dose treatments (Fig. 5 A, B). Additionally, comparing the treatment of various  
582 concentrations of an apoptotic agent staurosporine highlighted an apoptosis specific reduction  
583 in the levels of full length PfRFC1 at 5 $\mu$ M ST lower than the 10  $\mu$ M previously used to observe  
584 apoptosis in *Plasmodium*<sup>1</sup>.

585 The mislocalization of the endogenous PfRFC1 from the nucleus is associated with cell  
586 death at day 10 post treatment (Fig. 6 C, D). The delayed effect on cell growth could be  
587 attributed to the levels of the mislocalizer and the number of FKBP domains on the RFC1  
588 protein as observed with other parasite nuclear proteins subjected to knock-sideways<sup>29</sup>.  
589 Additionally, the progressive mislocalization of PfRFC1 over numerous cell cycles could have  
590 compounded its effect leading to a growth inhibition phenotype. The cells subjected to  
591 mislocalization also presented a defect in recovery from genotoxic stress earlier than the  
592 measurable growth effect (Fig. 6 E). These results suggest an essential role for PfRFC1 in  
593 responding to genotoxic stress in addition to its replication function.



594 We propose a model (Fig. 7) where an orchestrated sequence of replication events occur in  
595 trophozoite stages at the nucleus marked by punctate regions leading to DNA synthesis. These  
596 replication foci contain other replisome components such as PfPCNA1, PfORCs etc. and  
597 completion of replication in the schizont stages leads to their disassembly. PfRFC1 migrates to  
598 the nuclear periphery in schizonts and further outside the nucleus as a punctae in merozoites.  
599 Genotoxic stress however, affects this natural progression of the replication cycle leading to  
600 the recruitment of repair components to sites of DNA damage as evidenced by the absence of  
601 PfRFC1 at the nuclear periphery upon genotoxic stress. This study highlights the interplay  
602 between replication progression and DNA damage and recovery signals contributing to cell  
603 death.

604 **References:**

- 605 1. Ch'ng, J.-H., Kotturi, S. R., Chong, A. G.-L., Lear, M. J. & Tan, K. S.-W. A programmed  
606 cell death pathway in the malaria parasite *Plasmodium falciparum* has general features  
607 of mammalian apoptosis but is mediated by clan CA cysteine proteases. *Cell Death Dis.*  
608 **1**, e26–e26 (2010).
- 609 2. Gopalakrishnan, A. M. & Kumar, N. Antimalarial action of artesunate involves DNA  
610 damage mediated by reactive oxygen species. *Antimicrob. Agents Chemother.* **59**, 317–  
611 325 (2015).
- 612 3. Gunjan, S. *et al.* Mefloquine induces ROS mediated programmed cell death in malaria  
613 parasite: *Plasmodium*. *Apoptosis* **21**, 955–964 (2016).
- 614 4. Mok, S. *et al.* Population transcriptomics of human malaria parasites reveals the  
615 mechanism of artemisinin resistance. *Science (80-. ).* **347**, 431–435 (2015).
- 616 5. Mok, S. *et al.* Artemisinin resistance in *Plasmodium falciparum* is associated with an

- 617 altered temporal pattern of transcription. *BMC Genomics* **12**, 391 (2011).
- 618 6. Gibbons, J. *et al.* Altered expression of K13 disrupts DNA replication and repair in  
619 *Plasmodium falciparum*. *BMC Genomics* **19**, 849 (2018).
- 620 7. Yao, N. Y. & O'Donnell, M. The RFC clamp loader: structure and function. *Subcell.*  
621 *Biochem.* **62**, 259–79 (2012).
- 622 8. Chen, M., Pan, Z. Q. & Hurwitz, J. Studies of the cloned 37-kDa subunit of activator 1  
623 (replication factor C) of HeLa cells. *Proc. Natl. Acad. Sci. U. S. A.* **89**, 5211–5 (1992).
- 624 9. Luckow, B., Bunz, F., Stillman, B., Lichter, P. & Schütz, G. Cloning, expression, and  
625 chromosomal localization of the 140-kilodalton subunit of replication factor C from  
626 mice and humans. *Mol. Cell. Biol.* **14**, 1626–34 (1994).
- 627 10. Cullmann, G., Fien, K., Kobayashi, R. & Stillman, B. Characterization of the five  
628 replication factor C genes of *Saccharomyces cerevisiae*. *Mol. Cell. Biol.* **15**, 4661–71  
629 (1995).
- 630 11. Garg, P. & Burgers, P. M. J. DNA Polymerases that Propagate the Eukaryotic DNA  
631 Replication Fork. *Crit. Rev. Biochem. Mol. Biol.* **40**, 115–128 (2005).
- 632 12. Mossi, R. & Hübscher, U. Clamping down on clamps and clamp loaders--the eukaryotic  
633 replication factor C. *Eur. J. Biochem.* **254**, 209–216 (1998).
- 634 13. Kobayashi, M., AB, E., Bonvin, A. M. J. J. & Siegal, G. Structure of the DNA-bound  
635 BRCA1 C-terminal Region from Human Replication Factor C p140 and Model of the  
636 Protein-DNA Complex. *J. Biol. Chem.* **285**, 10087–10097 (2010).
- 637 14. Fotedar, R. *et al.* A conserved domain of the large subunit of replication factor C binds  
638 PCNA and acts like a dominant negative inhibitor of DNA replication in mammalian  
639 cells. *EMBO J.* **15**, 4423–4433 (1996).

- 640 15. Snider, J. & Houry, W. A. AAA+ proteins: diversity in function, similarity in structure.  
641 *Biochem. Soc. Trans.* **36**, 72–77 (2008).
- 642 16. Johnson, A., Yao, N. Y., Bowman, G. D., Kuriyan, J. & O'Donnell, M. The replication  
643 factor C clamp loader requires arginine finger sensors to drive DNA binding and  
644 proliferating cell nuclear antigen loading. *J. Biol. Chem.* **281**, 35531–43 (2006).
- 645 17. Podust, L. M., Podust, V. N., Floth, C. & Hubscher, U. *Assembly of DNA polymerase  $\delta$*   
646 *and  $\epsilon$  holoenzymes depends on the geometry of the DNA template. Nucleic Acids*  
647 *Research* **22**, (1994).
- 648 18. Uhlmann, F., Cai, J., Gibbs, E., O'Donnell, M. & Hurwitz, J. Deletion analysis of the  
649 large subunit p140 in human replication factor C reveals regions required for complex  
650 formation and replication activities. *J. Biol. Chem.* **272**, 10058–64 (1997).
- 651 19. Uhlmann, F., Gibbs, E., Cai, J., O'Donnell, M. & Hurwitz, J. Identification of regions  
652 within the four small subunits of human replication factor C required for complex  
653 formation and DNA replication. *J. Biol. Chem.* **272**, 10065–71 (1997).
- 654 20. Song, Q. *et al.* Specific cleavage of the large subunit of replication factor C in apoptosis  
655 is mediated by CPP32-like protease. *Biochem. Biophys. Res. Commun.* **233**, 343–348  
656 (1997).
- 657 21. Rhéaume, E. *et al.* The large subunit of replication factor C is a substrate for caspase-3  
658 in vitro and is cleaved by a caspase-3-like protease during fas-mediated apoptosis.  
659 *EMBO J.* **16**, 6346–6354 (1997).
- 660 22. Gupta, D. K., Patra, A. T., Zhu, L., Gupta, A. P. & Bozdech, Z. DNA damage regulation  
661 and its role in drug-related phenotypes in the malaria parasites. *Sci. Rep.* **6**, 1–15 (2016).
- 662 23. Brett M. Haltiwanger, ‡ *et al.* DNA Base Excision Repair in Human Malaria Parasites

- 663 Is Predominantly by a Long-Patch Pathway<sup>†</sup>. (2000). doi:10.1021/BI9923151
- 664 24. Mitra, P., Banu, K., Deshmukh, A. S., Subbarao, N. & Dhar, S. K. Functional dissection  
665 of proliferating-cell nuclear antigens (1 and 2) in human malarial parasite *Plasmodium*  
666 *falciparum*: possible involvement in DNA replication and DNA damage response.  
667 *Biochem. J.* **470**, 115–29 (2015).
- 668 25. Lee, A. H., Symington, L. S. & Fidock, D. A. DNA Repair Mechanisms and Their  
669 Biological Roles in the Malaria Parasite *Plasmodium falciparum*. *Microbiol. Mol. Biol.*  
670 *Rev.* **78**, 469–486 (2014).
- 671 26. Badugu, S. B. *et al.* Identification of *Plasmodium falciparum* DNA Repair Protein  
672 Mre11 with an Evolutionarily Conserved Nuclease Function. *PLoS One* **10**, e0125358  
673 (2015).
- 674 27. Kirkman, L. A., Lawrence, E. A. & Deitsch, K. W. Malaria parasites utilize both  
675 homologous recombination and alternative end joining pathways to maintain genome  
676 integrity. *Nucleic Acids Res.* **42**, 370–9 (2014).
- 677 28. Singer, M. *et al.* Zinc finger nuclease-based double-strand breaks attenuate malaria  
678 parasites and reveal rare microhomology-mediated end joining. *Genome Biol.* **16**, 249  
679 (2015).
- 680 29. Birnbaum, J. *et al.* A genetic system to study *Plasmodium falciparum* protein function.  
681 *Nat. Methods* **14**, 450–456 (2017).
- 682 30. Straimer, J. *et al.* Site-specific genome editing in *Plasmodium falciparum* using  
683 engineered zinc-finger nucleases. *Nat. Methods* **9**, 993–8 (2012).
- 684 31. Fidock, D. A. & Wellems, T. E. Transformation with human dihydrofolate reductase  
685 renders malaria parasites insensitive to WR99210 but does not affect the intrinsic

- 686 activity of proguanil. *Proc. Natl. Acad. Sci. U. S. A.* **94**, 10931–6 (1997).
- 687 32. Birnbaum, J. *et al.* A genetic system to study *Plasmodium falciparum* protein function.  
688 *Nat. Methods* **14**, 450–456 (2017).
- 689 33. Siau, A., Huang, X., Weng, M., Sze, S. K. & Preiser, P. R. Proteome mapping of  
690 *Plasmodium*: Identification of the *P. yoelii* remodelome. *Sci. Rep.* **6**, 1–12 (2016).
- 691 34. Flueck, C. *et al.* *Plasmodium falciparum* heterochromatin protein 1 marks genomic loci  
692 linked to phenotypic variation of exported virulence factors. *PLoS Pathog.* **5**, e1000569  
693 (2009).
- 694 35. Warbrick, E., Heatherington, W., Lane, D. P. & Glover, D. M. PCNA binding proteins  
695 in *Drosophila melanogaster* : the analysis of a conserved PCNA binding domain. *Nucleic  
696 Acids Res.* **26**, 3925–32 (1998).
- 697 36. Le Roch, K. G. *et al.* Discovery of gene function by expression profiling of the malaria  
698 parasite life cycle. *Science* **301**, 1503–8 (2003).
- 699 37. Bozdech, Z. *et al.* The transcriptome of the intraerythrocytic developmental cycle of  
700 *Plasmodium falciparum*. *PLoS Biol.* **1**, E5 (2003).
- 701 38. Patterson, S., Whittle, C., Robert, C. & Chakrabarti, D. Molecular characterization and  
702 expression of an alternate proliferating cell nuclear antigen homologue, PfPCNA2, in  
703 *Plasmodium falciparum*. *Biochem. Biophys. Res. Commun.* **298**, 371–6 (2002).
- 704 39. Gilbert, D. M. Making Sense of Eukaryotic DNA Replication Origins. *Science (80-. ).*  
705 **294**, 96–100 (2001).
- 706 40. Gupta, A. P. *et al.* Dynamic Epigenetic Regulation of Gene Expression during the Life  
707 Cycle of Malaria Parasite *Plasmodium falciparum*. *PLoS Pathog.* **9**, (2013).

- 708 41. Bártfai, R. *et al.* H2A.Z Demarcates Intergenic Regions of the Plasmodium falciparum  
709 Epigenome That Are Dynamically Marked by H3K9ac and H3K4me3. *PLoS Pathog.* **6**,  
710 e1001223 (2010).
- 711 42. Gopalakrishnan, A. M. & Kumar, N. Opposing roles for two molecular forms of  
712 replication protein A in Rad51-Rad54-mediated DNA recombination in Plasmodium  
713 falciparum. *MBio* **4**, e00252-13 (2013).
- 714 43. Schwartz, J. L. Monofunctional alkylating agent-induced S-phase-dependent DNA  
715 damage. *Mutat. Res.* **216**, 111–8 (1989).
- 716 44. Ahmad, S. I., Kirk, S. H. & Eisenstark, A. Thymine metabolism and thymineless death  
717 in prokaryotes and eukaryotes. *Annu. Rev. Microbiol.* **52**, 591–625 (1998).
- 718 45. Rosenkranz, H. S. & Levy, J. A. HYDROXYUREA: A SPECIFIC INHIBITOR OF  
719 DEOXYRIBONUCLEIC ACID SYNTHESIS. *Biochim. Biophys. Acta* **95**, 181–3  
720 (1965).
- 721 46. Gunjan, S. *et al.* Artemisinin Derivatives and Synthetic Trioxane Trigger Apoptotic Cell  
722 Death in Asexual Stages of Plasmodium. *Front. Cell. Infect. Microbiol.* **8**, 1–10 (2018).
- 723 47. Robinson, M. S., Sahlender, D. A. & Foster, S. D. Rapid Inactivation of Proteins by  
724 Rapamycin-Induced Rerouting to Mitochondria. *Dev. Cell* **18**, 324–331 (2010).
- 725 48. Hughes, K. R. & Waters, A. P. Rapid inducible protein displacement in Plasmodium in  
726 vivo and in vitro using knocksideways technology. *Wellcome Open Res.* **2**, 18 (2017).
- 727 49. Fox, M. H., Jovin, T. M. & Baumann, P. H. Spatial and temporal distribution of DNA  
728 replication sites localized by immunofluorescence and confocal microscopy in mouse  
729 fibroblasts. (1989).
- 730 50. Gupta, A., Mehra, P. & Dhar, S. K. Plasmodium falciparum origin recognition complex

- 731 subunit 5: Functional characterization and role in DNA replication foci formation. *Mol.*  
732 *Microbiol.* **69**, 646–665 (2008).
- 733 51. Gupta, A. *et al.* Functional Dissection of the Catalytic Carboxyl-Terminal Domain of  
734 Origin Recognition Complex Subunit 1 (PfORC1) of the Human Malaria Parasite  
735 *Plasmodium falciparum*. *Eukaryot. Cell* **8**, 1341–1351 (2009).
- 736 52. Chêne, A. *et al.* PfAlbas constitute a new eukaryotic DNA/RNA-binding protein family  
737 in malaria parasites. *Nucleic Acids Res.* **40**, 3066–3077 (2012).
- 738 53. Overmeer, R. M. *et al.* Replication Factor C Recruits DNA Polymerase  $\delta$  to Sites of  
739 Nucleotide Excision Repair but Is Not Required for PCNA Recruitment. *Mol. Cell. Biol.*  
740 **30**, 4828–4839 (2010).
- 741 54. Tsurimoto, T. *PCNA BINDING PROTEINS*. *Frontiers in Bioscience* **4**, (1999).
- 742 55. Gardner, M. J. *et al.* Genome sequence of the human malaria parasite *Plasmodium*  
743 *falciparum*. *Nature* **419**, 498–511 (2002).
- 744 56. Krokan, H. E., Nilsen, H., Skorpen, F., Otterlei, M. & Slupphaug, G. Base excision  
745 repair of DNA in mammalian cells. *FEBS Lett.* **476**, 73–7 (2000).
- 746 57. Hashiguchi, K., Matsumoto, Y. & Yasui, A. Recruitment of DNA repair synthesis  
747 machinery to sites of DNA damage/repair in living human cells. *Nucleic Acids Res.* **35**,  
748 2913–2923 (2007).
- 749 58. Picot, S., Burnod, J., Bracchi, V., Chumpitazi, B. F. & Ambroise-Thomas, P. Apoptosis  
750 related to chloroquine sensitivity of the human malaria parasite *Plasmodium falciparum*.  
751 *Trans. R. Soc. Trop. Med. Hyg.* **91**, 590–1 (1997).
- 752

753 **Acknowledgement:**

754 WR99210 used was a kind donation from Jacobus Pharmaceuticals, Princeton, NJ. pSLI-  
755 2xFKBP-GFP and pLyn-FRB-mCherry-nmd3-BSD were a gift from Tobias Spielmann. We  
756 thank Prof. Suman Kumar Dhar, Special Centre for Molecular Medicine of Jawaharlal Nehru  
757 University, India for his kind assistance with the PCNA1 antibody western blot. The authors  
758 are grateful to the members of Peter Preiser's lab for the critical reading of the manuscript. This  
759 research is supported by the Singapore Ministry of Health's National Medical Research  
760 Council under its Open Fund Individual Research Grants (OFIRG17may073), the Singapore  
761 Ministry of Health's National Medical Research Council under its Cooperative Basic Research  
762 Grant (CBRG12nov014) and the Singapore Ministry of Education, Singapore, under the  
763 NTUitive Gap Fund (NGF-2017-03-032). The funders had no role in study design, data  
764 collection and interpretation, or the decision to submit the work for publication.

765

766

767 **Figures:**

768 **Fig. 1:** Endogenously tagged PfRFC1 localizes dynamically throughout intraerythrocytic  
769 developmental cycle

770 **(A)** PfRFC1 shows low sequence identity to homologs in human (HsRFC1) and yeast  
771 (ScRFC1). **(B)** PfRFC1 contains all the conserved boxes in their corresponding order with **(C)**  
772 an N-terminal extension prior to the replication factory targeting sequence (RFTS) in  
773 comparison to the RFTS in the RFC1 of Human(hRFC1), mouse (mRFC1) or yeast (ScRFC1).  
774 **(D)** PfRFC1 was endogenously tagged with a 3xHa tag and integration was verified via PCR.  
775 **(E)** Tagged PfRFC1 was identified by anti-Ha antibody in the Parasite fraction. **(F)** PfRFC1  
776 (green) was identified in the ring, trophozoite and schizont stages and PfAldolase was used as



777 a loading control (Red). **(G)** Real-Time PCR show variability in the stage specific expression  
778 levels of the RFC1 transcript across the various laboratory strains. **(H)** Super resolution  
779 microscopy on immunofluorescence samples of trophozoite and schizont, and ruptured  
780 schizont stages show specific nuclear localization (Pearson's Coefficient:  $r=0.733$  for  
781 trophozoites;  $r=0.779$  for schizonts;  $0.762$  for ruptured schizonts measured for DAPI and HA  
782 co-localization). The segmented schizonts shows perinuclear localization while the ruptured  
783 schizont show a single punctae in the nucleus (white arrow). DAPI (White), PfEXP2/  
784 H3K4Me3 (Green), and HA (Red). 5x Magnified insets of representative trophozoite, schizont  
785 and ruptured schizonts nuclei are provided. The pie-charts reflect the PfRFC1 signal % within  
786 and outside the nucleus respectively of at least 3 individual cells.

787

788 **Fig. 2:** IP of PfRFC1 confirms a complex associating with PfPCNA1.

789 **(A)** Immunoprecipitation of PfRFC1 was performed and the various samples were loaded on  
790 a SDS-Page and subjected to western blotting as follows. The lane one contains the input  
791 parasite lysate, lane 2 contains the eluted fraction from control beads and the lane 3 contains  
792 the eluted fractions from the HA beads. The blots were probed with anti HA antibody to  
793 confirm the specific immunoprecipitation of PfRFC1 at the expected size, PfAldolase and  
794 PfHistone 3 were used as a loading controls. PfPCNA1 was identified in the HA bead fraction  
795 which also contains the enriched PfRFC1. PfPCNA1 was observed to be specifically present  
796 in the HA beads although in low abundance as seen via the short and long exposure of the  
797 blot.**(B)** The Pie-chart represents proteins with  $\geq 4$  peptides detected to be enriched on the HA  
798 beads as compared with the control beads. These proteins are enriched in the components of  
799 the Replication factor C. Number of peptides enriched are mentioned within the pie chart for  
800 each protein **(C)** A malaria metabolic pathway enrichment profile of the immunoprecipitated

801 proteins shows enrichment of components involved in oxidative stress, DNA replication and  
802 repair as compared with the database at plasmodb.org (Release 44).

803

804 **Fig. 3:** PfRFC1 is stimulated upon DNA damage.

805 (A) Endogenously tagged PfRFC1 expressing trophozoite cells were treated with control (Lane  
806 1), MMS (Lane 2) or Hydroxyurea (Lane 3) and western blotting of the whole parasite lysates  
807 was performed. The levels of PfAldolase were used as the loading control to determine PfRFC1  
808 levels using anti HA antibodies. (B) Three independent experiments were performed and the  
809 densitometric analysis of RFC1 was normalised to that of PfAldolase and represented  
810 graphically. The results show means  $\pm$ S.E.M (n=3,p=0.014 for MMS and p=0.023 for HU).(C)  
811 Immunofluorescence was performed on the developing schizonts from the above treatments  
812 and probed with anti HA (Red), Anti H3K4Me3 (Green) and stained the nucleus with DAPI  
813 (White). The Perinuclear staining in the control treated samples for PfRFC1 was not observed  
814 in the cells subjected to genotoxic stress. White arrows indicate regions where PfRFC1 and  
815 H3K4Me3 do not co-localize.

816 **Fig. 4:** PfRFC1 $\Delta$ 2 –HA affects DNA damage recovery

817 (A) A cartoon representation of the domain positions in the full length RFC1 protein as well  
818 as that of the N-terminal truncation containing the RFTS and the BRCT domain. (B) The  
819 parasite lysates from the wild type 3D7 and the RFC1 $\Delta$ 2-HA were subjected to western blotting  
820 and probed with anti-HA antibody and PfAldolase as a loading control. Ectopically expressed  
821 PfRFC1 $\Delta$ 2-HA was observed at the expected size using anti-HA antibody. (C) RFC1 $\Delta$ 2-HA  
822 cells were subjected to fractionation using detergents to separate the cells into a soluble fraction  
823 and an insoluble chromatin bound fraction. Anti-HA antibody was used to detect PfRFC1 $\Delta$ 2-  
824 HA, and PfAldolase and PfHistone3 were used as controls. The detergent resistant, PfAldolase

825 free fraction identified the presence of PfRFC1 $\Delta$ 2-HA confirming its interaction with  
826 chromatin. (D) Immunofluorescence assay was performed on the intraerythrocytic stages of  
827 PfRFC1 $\Delta$ 2-HA and probed with anti HA (Red), Anti-EXP2 (Green) and stained the nucleus  
828 with DAPI (White). PfRFC1 $\Delta$ 2-HA was present within the nucleus as diffuse signals in early  
829 and late trophozoites, and schizonts. (E) An assay to measure recovery from Genotoxic stress  
830 was performed as described in the flowchart. Trophozoite stage of PfRFC1 $\Delta$ 2-HA (~34Hpi)  
831 were subjected to DMSO as control or MMS treatments at various concentrations for 6 hours.  
832 The drug was then washed out and the parasites were allowed to recover and measurements  
833 were made in the next cycle. It was observed that PfRFC1 $\Delta$ 2-HA subjected to intermediate  
834 concentrations of MMS recovered to lesser extent (n=3, \* represents P<0.05) than the vector  
835 control parasites.

836 **Fig. 5:** Effect of antimalarial drugs on PfRFC1

837 (A) A bar chart representing the levels of PfRFC1 upon treatment of PfRFC1-3HA trophozoite  
838 parasites with controls, Artesunate at 1xIC<sub>50</sub>, 10xIC<sub>50</sub>, and Chloroquine at 1xIC<sub>50</sub>, 10xIC<sub>50</sub> and  
839 100xIC<sub>50</sub> for 6 hours. 1% Sodium azide treated parasites were used as a control for unregulated  
840 necrosis. Parasites treated with 10xIC<sub>50</sub> Artesunate and 100xIC<sub>50</sub> of Chloroquine showed  
841 significant reduction in the levels of full length PfRFC1 comparable to that of 1% Sodium azide  
842 treated parasites. (n=3, \* represents p<0.05). (B) A bar chart representing the levels of PfRFC1  
843 upon treatment of synchronized trophozoite parasites expressing PfRFC1-3HA with  
844 staurosporine (ST) at 1, 2, 5  $\mu$ M. (n=3, \* represents p<0.05). The levels of PfRFC1 reduced  
845 significantly at 5  $\mu$ M ST. 0.1% sodium azide, a necrosis control showed no significant change.

846

847 **Fig. 6:** Mislocalisation of PfRFC1-GFP is detrimental

848 (A) PfRFC1 was endogenously tagged with a 2xFKBP-GFP tag and integration was verified  
849 via PCR. (B) The parasite lysates from the wild type 3D7 and the PfRFC1-GFP were subjected  
850 to western blotting and probed with anti-GFP antibody and PfAldolase as a loading control.  
851 The endogenously expressed PfRFC1-GFP was observed at the expected size using anti-GFP  
852 antibody. (C) Parasites treated with control or Rapamycin were observed under the  
853 fluorescence microscope. In control treated parasites PfRFC1-GFP (Green) was observed in  
854 the nuclear fraction while the mislocalizer was observed in the parasite periphery (Red). Upon  
855 treatment with Rapamycin, the GFP signals of PfRFC1-GFP were sequestered beyond the  
856 nucleus into the parasite. (D) The parasitemia was traced for PfRFC1-GFP parasites treated  
857 with control or rapamycin. On cycle 5 onwards the parasitemia in the treated parasites  
858 depreciated leading to death (n=3, \* represents  $p<0.05$ ). (E) A recovery from Genotoxic stress  
859 assay was performed on day 6 trophozoite stage of PfRFC1-GFP (~34Hpi) subjected to control  
860 or rapamycin induced mislocalization. These were treated with DMSO as control or MMS  
861 treatments at various concentrations for 6 hours. The drug was then washed out and the  
862 parasites were allowed to recover and measurements were made in the next cycle. It was  
863 observed that PfRFC1-GFP subjected to MMS stress recovered to lesser extent (marked with  
864 \*, $P<0.05$ ) than the control treated and non-mislocalized parasites.

865

866 **Fig. 7:** model representing the role of PfRFC1 in replication and DNA damage repair of *P.*  
867 *falciparum*:

868 (A) The replication foci begins to form in the maturing ring stages of the parasites and PfRFC1  
869 is recruited to these sites via potential interactions with other replisome proteins such as  
870 PfPCNA1. The Replication foci helps synthesize new DNA thereby generating new DNA  
871 content for the maturing trophozoites and schizonts. Upon completion of replication, while

872 PfPCNA1 and PforC5 are disassembled from the replication foci, PforFC1 is sequestered to  
873 the nuclear periphery. **(B)** When the Parasites are subjected to genomic stress PforFC1 and  
874 other DNA repair proteins are recruited to the sites of DNA damage promoting its repair. This  
875 leads to the presence of PforFC1 within the nucleus and potential halting of DNA replication.

876 Supplementary Data:

877 **Fig. S 1:** PforFC1 localizes dynamically throughout intraerythrocytic developmental cycle:

878 IFA was performed on smears of tagged PforFC1 expressing parasites and probed with anti-  
879 HA antibody (Red) to mark PforFC1 which localizes at the nucleus stained by DAPI (White).  
880 The ring, early and late trophozoite, and schizonts were identified using bright field (BF) and  
881 by the nuclear staining.

882

883 **Fig. S 2:** PforFC1 is stimulated upon DNA damage

884 PforFC1-3HA parasites treated with MMS and HU were extracted into a detergent soluble  
885 fraction and an insoluble (IN) or the chromatin bound fraction (SF) and analyzed by western  
886 blotting. PforFC1 was detected using anti-HA antibody. PfAldolase was used as a loading  
887 control for the soluble fraction and PfHistone3 for the chromatin bound fraction. **(B)**  
888 Quantification of the various samples via the normalization of the PforFC1 signals with regards  
889 to PfAldolase or PfHistone3 revealed a significant upregulation in the samples treated with  
890 MMS or HU. The results show means  $\pm$ S.E.M (n=3, IN: p=0.013 for MMS and p=0.023 for  
891 HU; SF: p=0.038 for MMS and p=0.009 for HU). **(C)** Cells found at the trophozoite stages  
892 after the 6 hour treatment were also subjected to immunofluorescence and probed with anti HA  
893 (Red), Anti H3K4Me3 (Green) and stained the nucleus with DAPI (White). The nuclear  
894 localization of PforFC1 remained comparable irrespective of the treatments at the trophozoite  
895 stages.

896 **Fig. S 3:** Effect of antimalarial drugs on PfRFC1:

897 (A) PfRFC1-3HA trophozoite parasites were treated with controls, Artesunate at  $1 \times IC_{50}$ ,  
898  $10 \times IC_{50}$  and Chloroquine at  $1 \times IC_{50}$ ,  $10 \times IC_{50}$  and  $100 \times IC_{50}$  for 6 hours. 1% sodium azide treated  
899 parasites were used as a control for necrosis. Parasites treated with  $10 \times IC_{50}$  Artesunate and  
900  $100 \times IC_{50}$  of Chloroquine showed significant reduction in the levels of full length PfRFC1  
901 comparable to that of 1% Sodium azide treated parasites. Anti-HA antibody detected PfRFC1.  
902 PfAldolase was used as a control protein and its levels remains unchanged. (B) Synchronized  
903 trophozoite PfRFC1-HA parasites were treated with staurosporine (ST) at 1, 2, 5  $\mu$ M. The  
904 levels of PfRFC1 reduced significantly at 5  $\mu$ M ST. 0.1% sodium azide, a necrosis control  
905 showed no significant change. Anti-HA antibody detected PfRFC1. PfAldolase was used as a  
906 control protein and its levels remains unchanged. (C) Staurosporine (ST) at 1, 2, 5  $\mu$ M were  
907 added to synchronized trophozoite parasites expressing PfRFC1 $\Delta$ 2-HA. These parasites were  
908 treated for 10 hours and 0.1% sodium azide was used as a necrosis control. The parasites were  
909 released via saponin treatment and subjected to western blotting using anti-HA antibody to  
910 detect PfRFC1 $\Delta$ 2. PfAldolase was used as a control protein and its levels remains unchanged.  
911 The bar chart summarizes the levels of PfRFC1 $\Delta$ 2 upon treatment with staurosporine (ST) at  
912 1, 2, 5  $\mu$ M. (n=3). The levels of PfRFC1 $\Delta$ 2-HA did not alter significantly. 0.1% sodium azide,  
913 a necrosis control showed no significant change.

914 **Table S1:** List of all primers used in the study.

915 **Table S2:** List of all *P.falciparum* and contaminating proteins detected via mass spectrometry.

# *Plasmodium falciparum* Replication factor C 1 is involved in genotoxic stress response

Sheriff O<sup>a</sup>, Aniweh Y<sup>b</sup>, Soak Kuan<sup>a</sup>, Loo HL<sup>c</sup>, Sze, S. K<sup>a</sup>, Preiser PR<sup>a,c</sup>#

a. School of Biological Sciences, Nanyang Technological University Singapore, Singapore, Singapore.

b. West African Centre for Cell Biology of Infectious Pathogens, University of Ghana, Legon, Ghana.

c. Antimicrobial Resistance Interdisciplinary Research Group, Singapore-MIT Alliance for Research and Technology, Singapore, Singapore..

# Correspondence and requests for materials should be addressed to P.R.P. (email: prpreiser@ntu.edu.sg)

**Fig. 1: Endogenously tagged PfRFC1 localizes dynamically throughout intraerythrocytic developmental cycle**

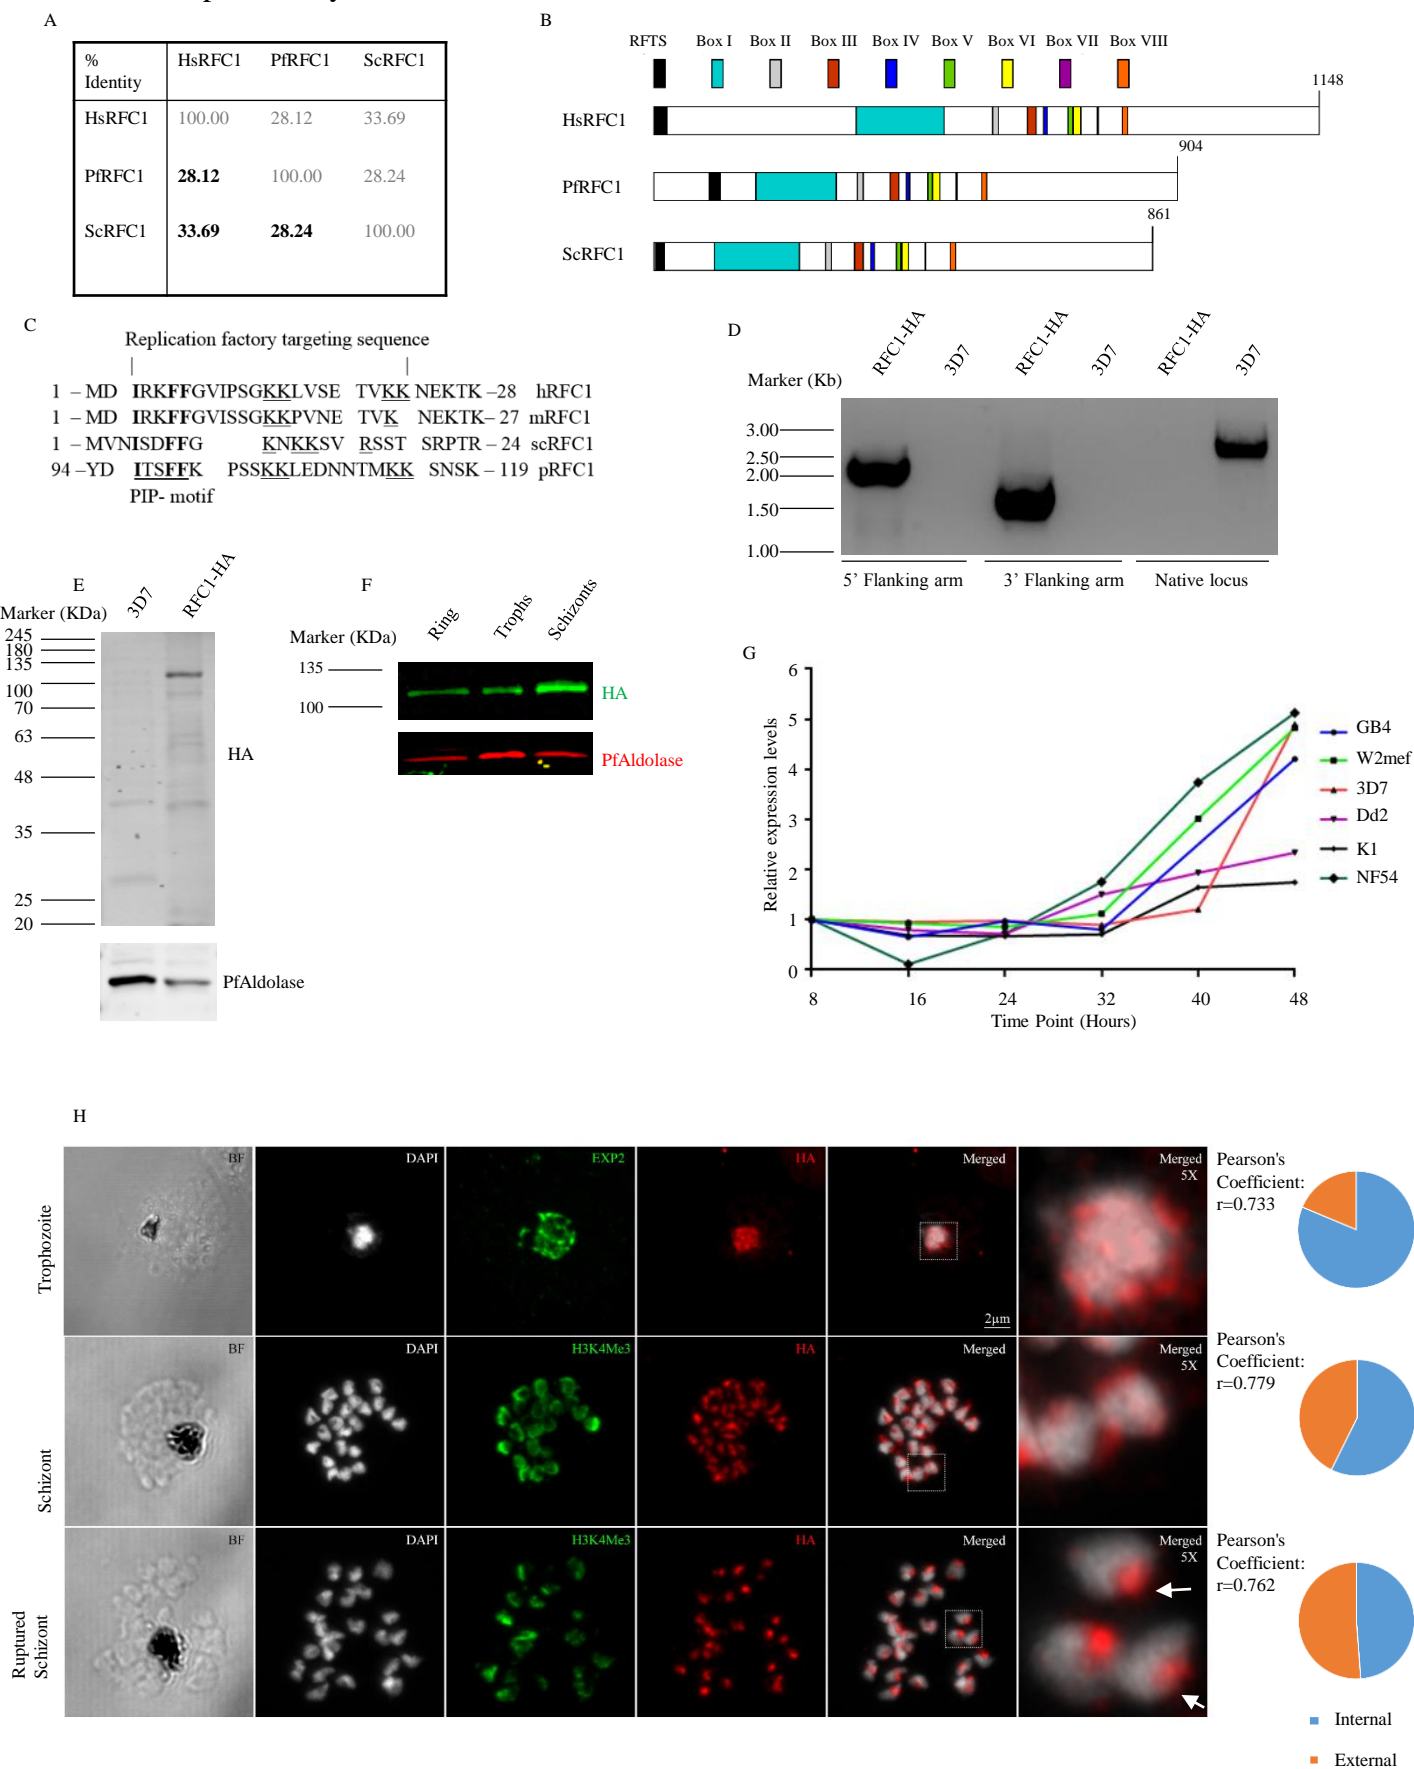



Fig. 2: IP of PfRFC1 confirms a complex associating with PfPCNA1

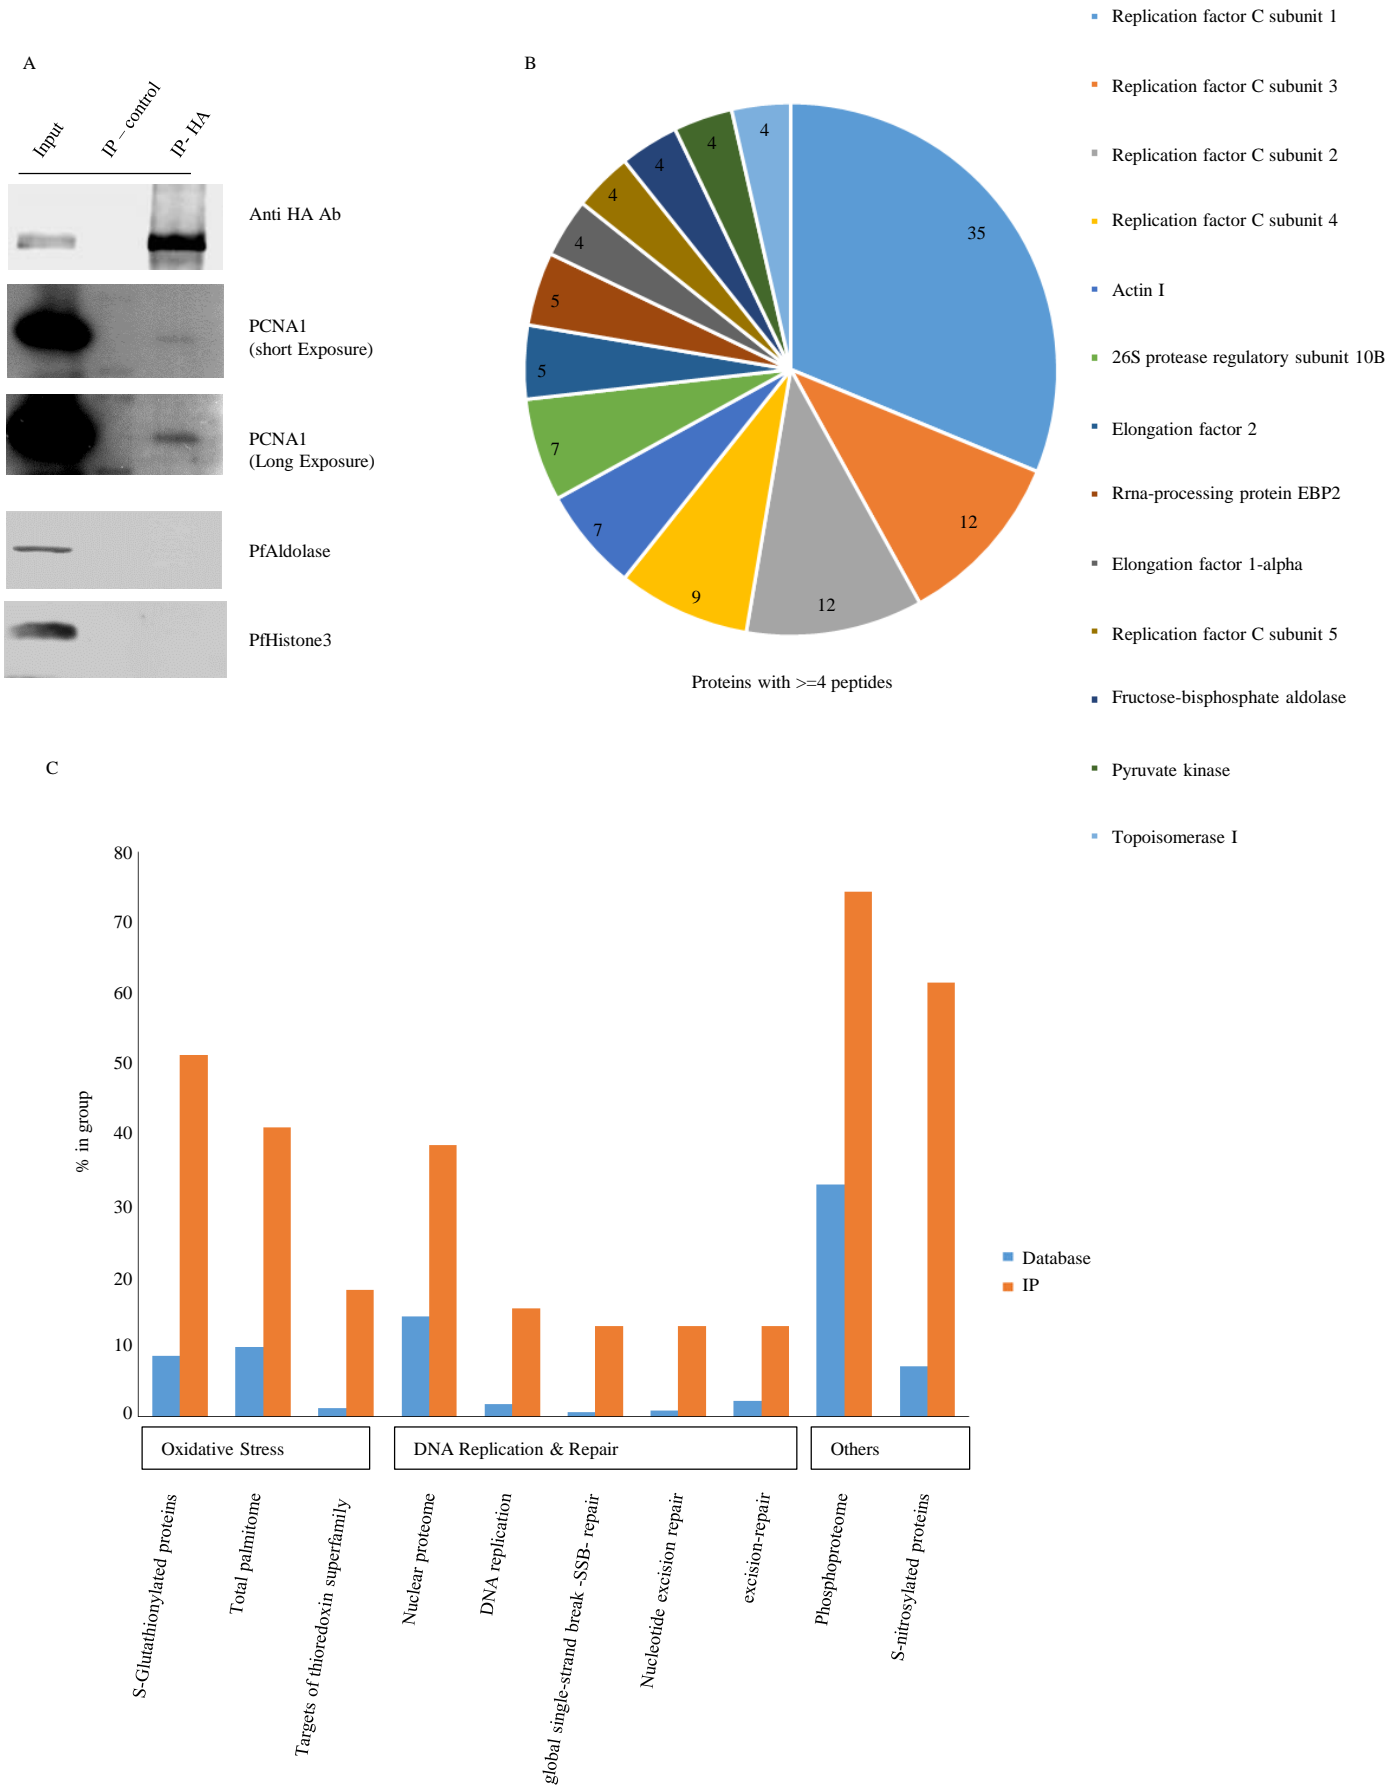

Fig. 3: PfRFC1 is stimulated upon DNA damage

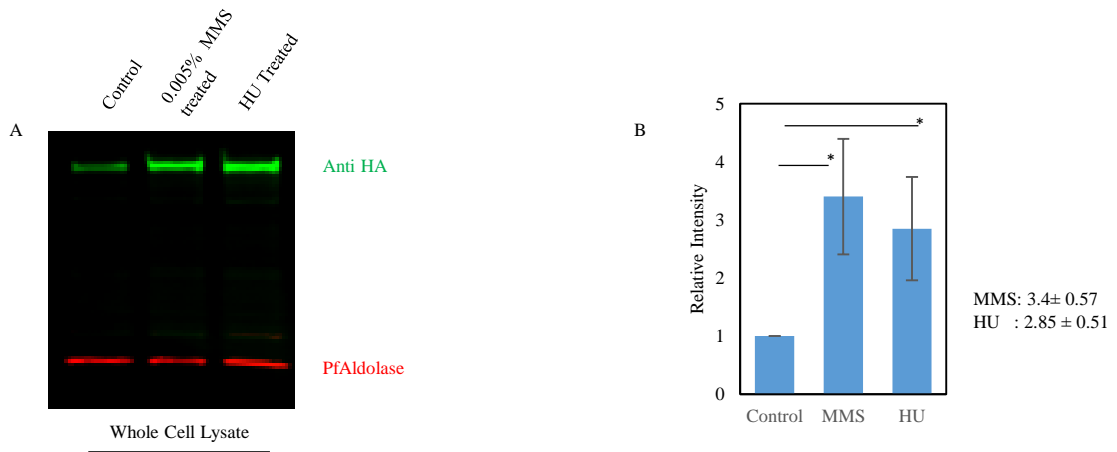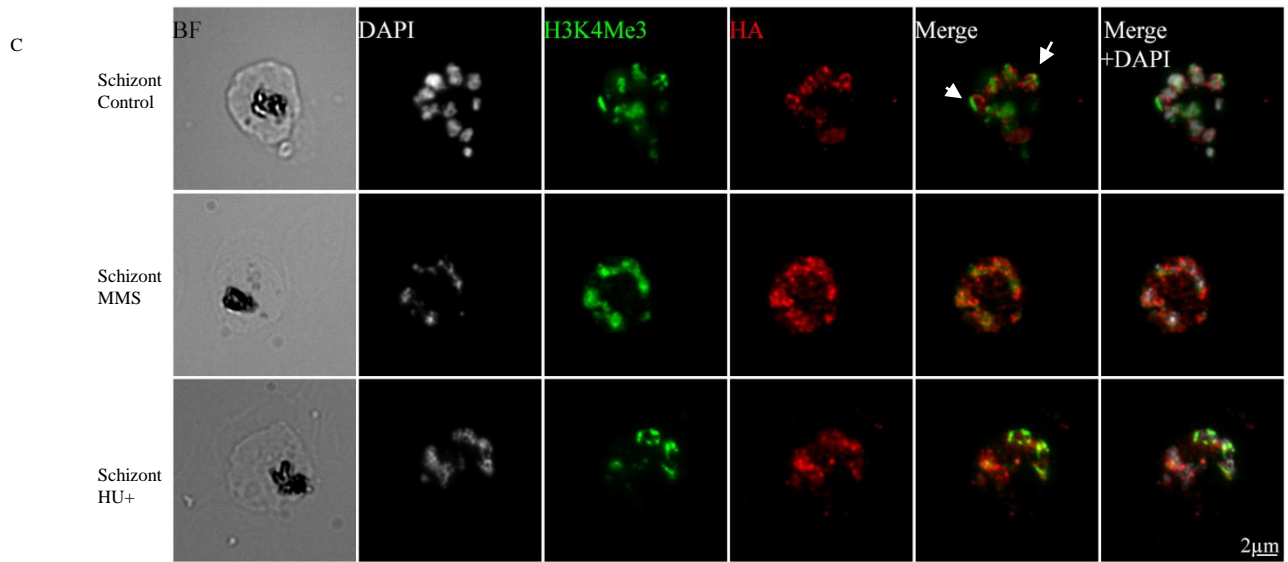

Fig. 4: RFC1 $\Delta$ 2 -HA affects DNA damage recovery

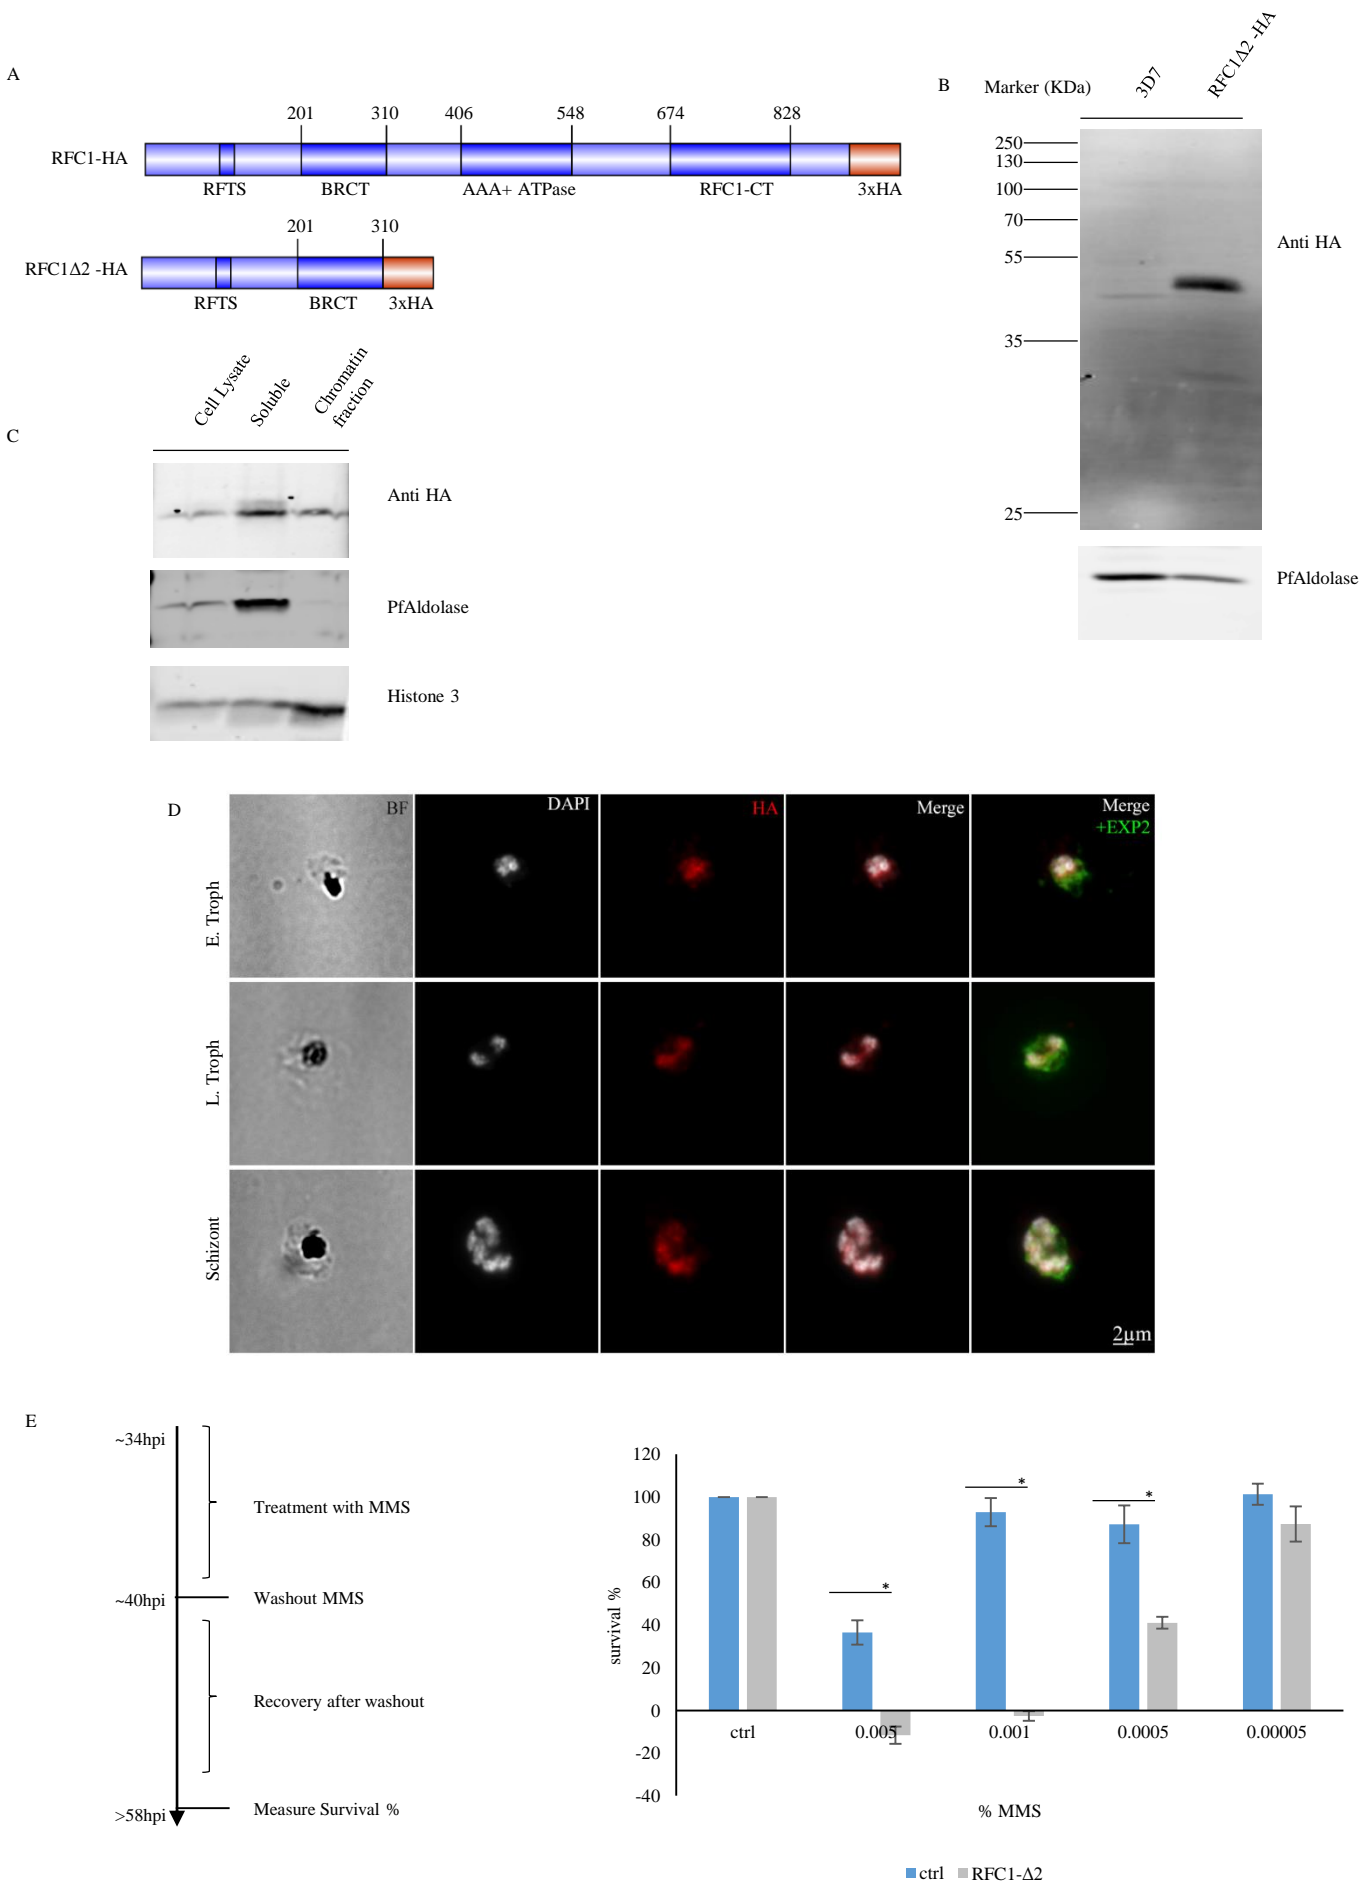

Fig. 5: Effect of antimalarial drugs on PfRFC1

A

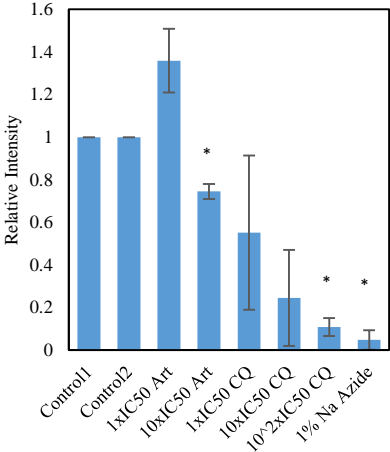

B

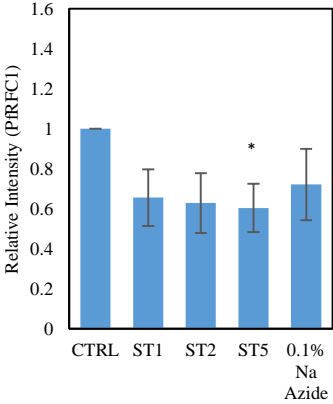

Fig. 6: Mislocalisation of PfRFC1-GFP is detrimental

A

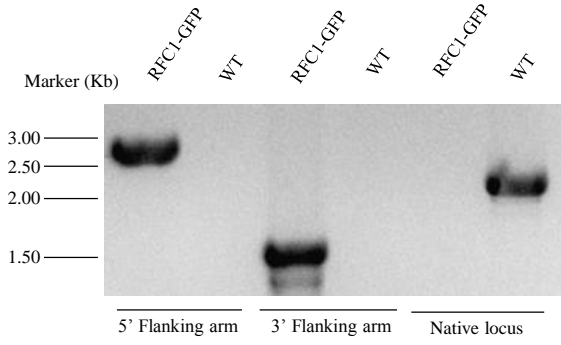

B

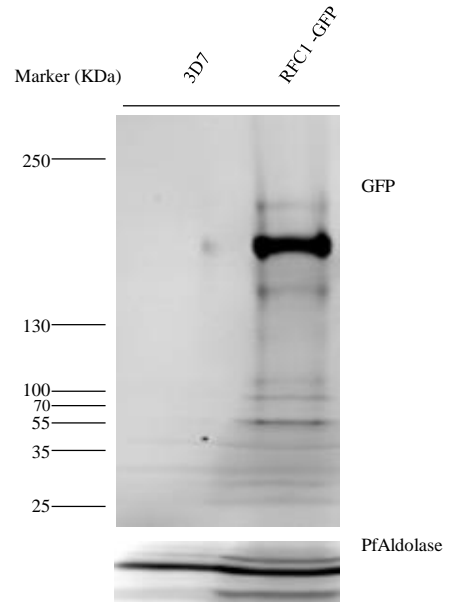

C

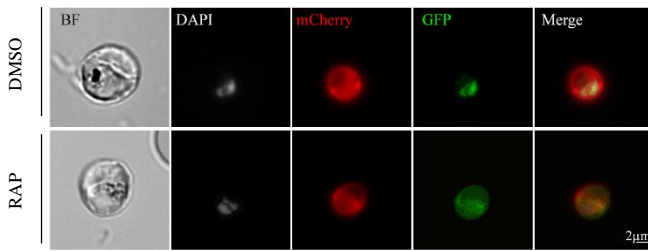

D

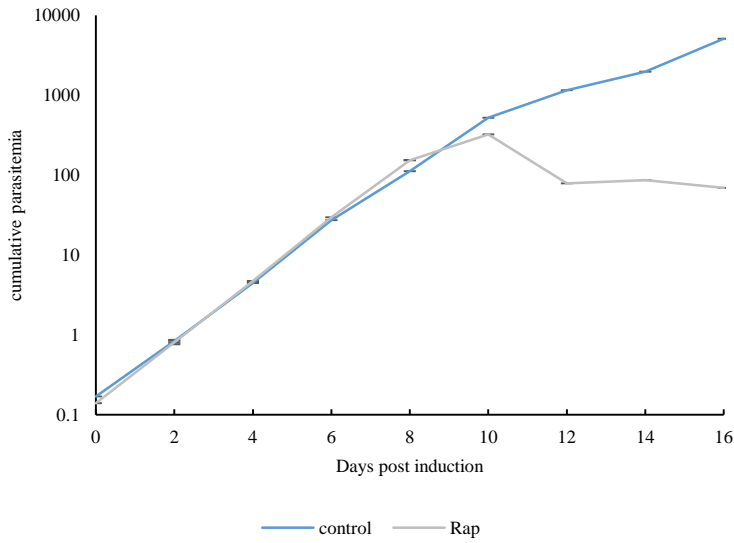

E

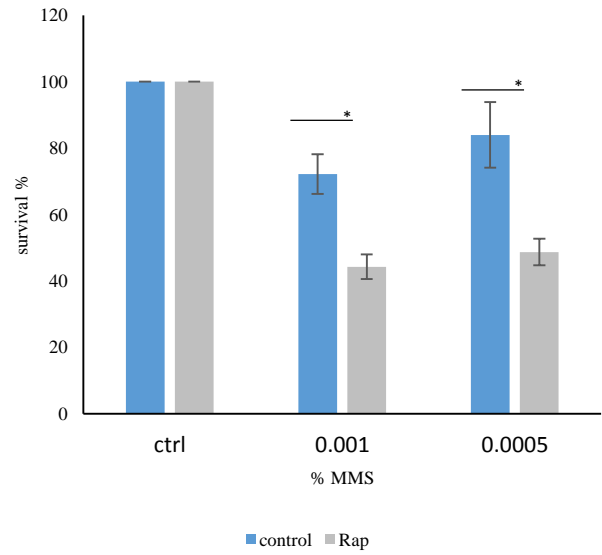

Fig 7: model representing the role of PfrRFC1 in replication and DNA damage repair of *P. falciparum*:

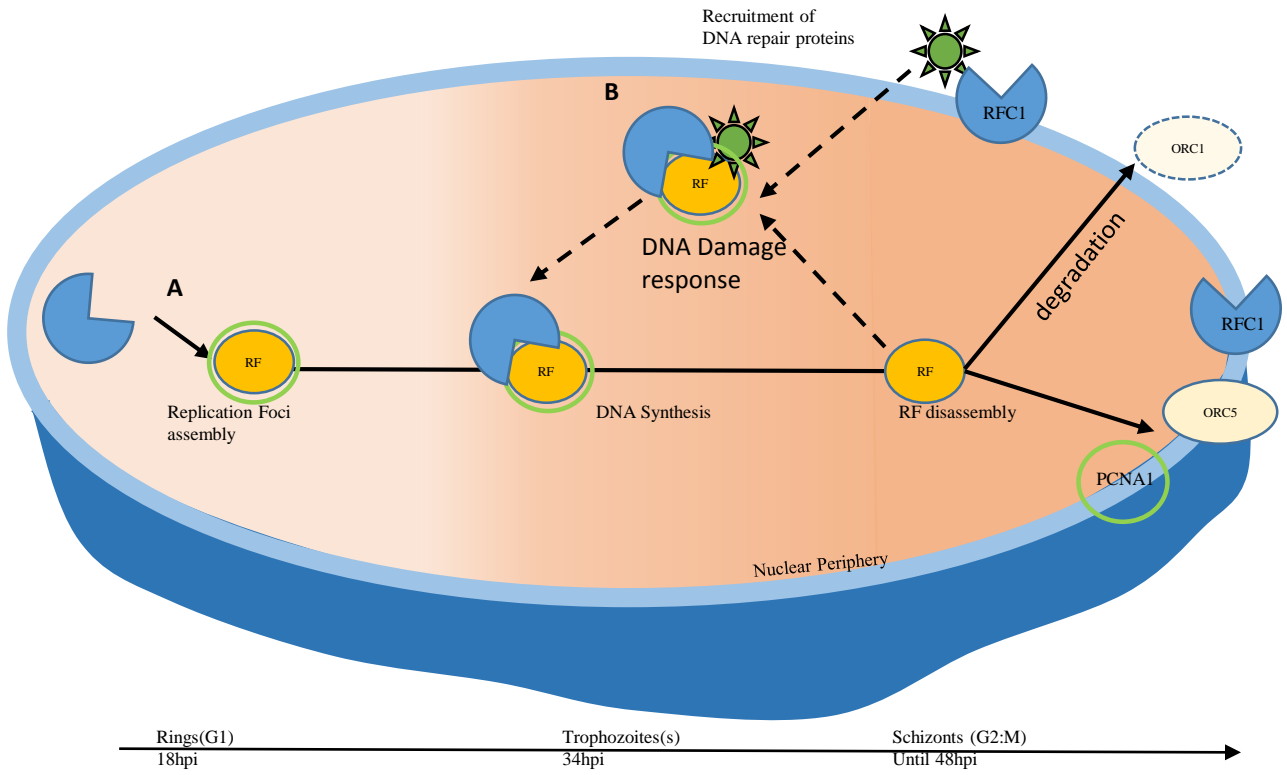

Fig. S1: RFC1 localizes dynamically throughout IDC

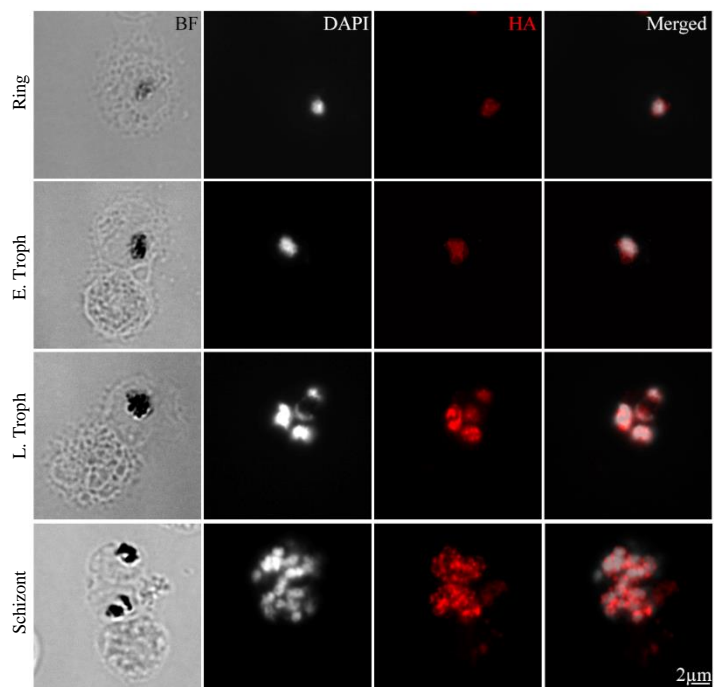

Fig. S2: PfRFC1 is stimulated upon DNA damage

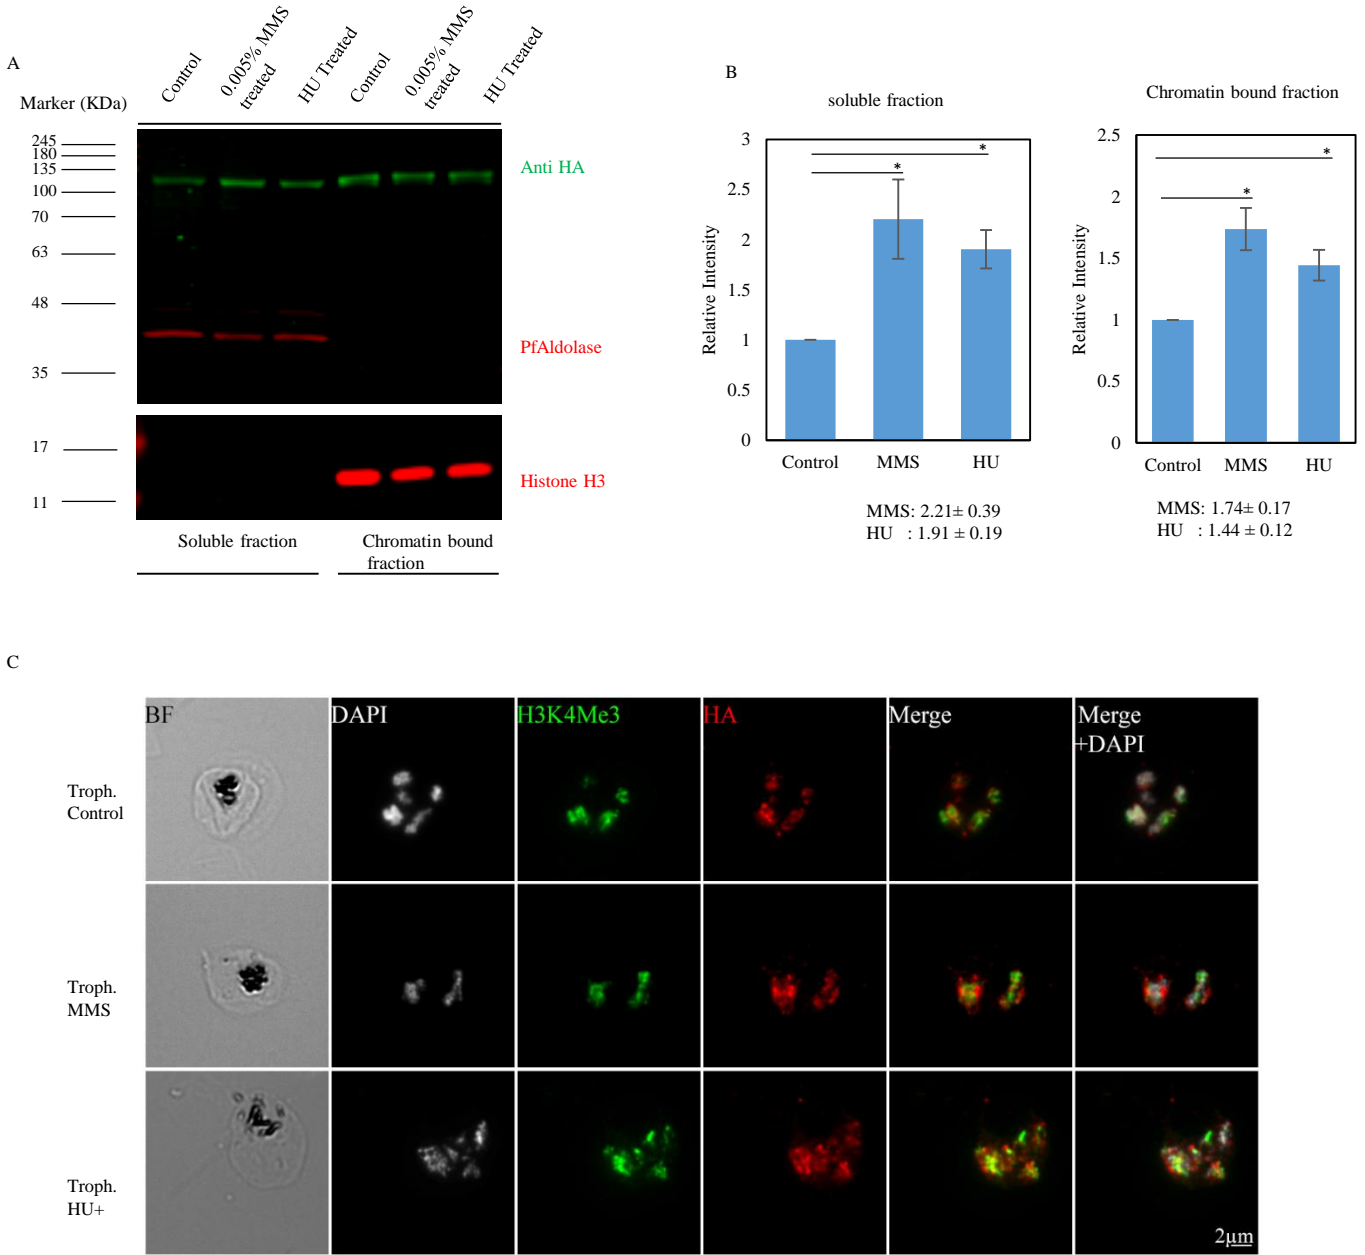



Fig. S3: Effect of antimalarial drugs on PfRFC1

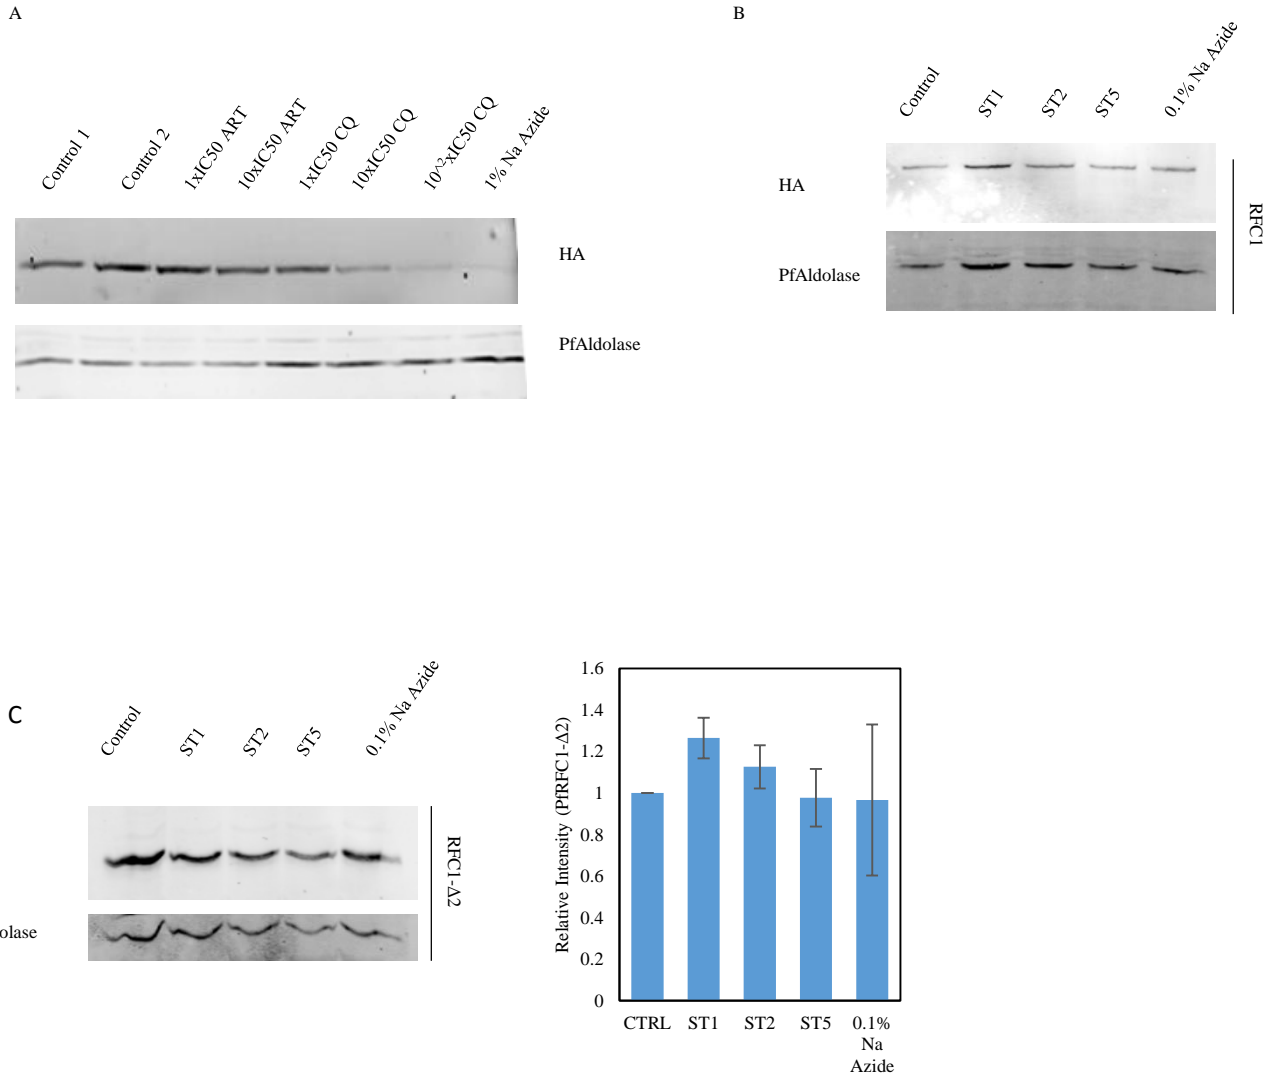

Source: http://biorxiv.org/content/10.1101/2020.05.26.118224v1.full.pdf
